# Enviromic assembly increases accuracy and reduces costs of the genomic prediction for yield plasticity

Germano Costa-Neto<sup>1\*</sup>, Jose Crossa<sup>2,3</sup> and Roberto Fritsche-Neto<sup>1,4</sup>

<sup>1</sup> Department of Genetics, "Luiz de Queiroz" Agriculture College, University of São Paulo (ESALQ/USP), Piracicaba, Brazil.

<sup>2</sup> Biometrics and Statistics Unit, International Maize and Wheat Improvement Center (CIMMYT), Carretera México -Veracruz, Km 45, Col. El Batán, CP 56237, Texcoco, Edo. de México, México

<sup>3</sup> Colegio de Posgraduado, Montecillo, Texcoco, Edo. de México, México.

<sup>4</sup> Breeding Analytics and Data Management Unit, International Rice Research Institute (IRRI), Los Baños, Philippines

## \* Correspondence:

Germano Costa-Neto

[germano.cneto@gmail.com](mailto:germano.cneto@gmail.com)

**Keywords:** genomic selection, adaptability, genotype × environment, climate-smart; selective phenotyping

## ABSTRACT

Quantitative genetics states that phenotypic variation is a consequence of genetic and environmental factors and their subsequent interaction. Here, we present an enviromic assembly approach, which includes the use of ecophysiology knowledge in shaping environmental relatedness into whole-genome predictions (GP) for plant breeding (referred to as E-GP). We propose that the quality of an environment is defined by the core of environmental typologies (envirotypes) and their frequencies, which describe different zones of plant adaptation. From that, we derive markers of environmental similarity cost-effectively. Combined with the traditional genomic sources (e.g., additive and dominance effects), this approach may better represent the putative phenotypic variation across diverse growing conditions (i.e., phenotypic plasticity). Additionally, we couple a genetic algorithm scheme to design optimized multi-environment field trials (MET), combining enviromic assembly and genomic kinships to provide in-silico realizations of the future genotype-environment combinations that must be phenotyped in the field. As a proof-of-concept, we highlight E-GP applications: (1) managing the lack of phenotypic information in training accurate GP models across diverse environments and (2) guiding an early screening for yield plasticity using optimized phenotyping efforts. Our approach was tested using two non-conventional cross-validation schemes to better visualize the benefits of enviromic assembly in sparse experimental networks. Results on tropical maize show that E-GP outperforms benchmark GP in all scenarios and cases tested. We show that for training accurate GP models, the genotype-environment combinations' representativeness is more critical than the MET size. Furthermore, we discuss theoretical backgrounds underlying how the intrinsic envirotypes-phenotype covariances within the phenotypic records of (MET) can impact the accuracy of GP and limits the potentialities of predictive breeding approaches. The E-GP is an efficient approach to better use environmental databases to deliver climate-smart solutions, reduce field costs, and anticipate future scenarios.

## 40 1 INTRODUCTION

41 Environmental changing scenarios challenge agricultural research to deliver climate-smart  
42 solutions in a time-reduced and cost-effective manner (Tigchelaar *et al.*, 2018; Ramírez-Villegas *et al*  
43 2020; Cortés *et al.*, 2020). Characterizing crop growth conditions is crucial for this purpose (Xu, 2016),  
44 allowing a deeper understanding of how the environment shapes past, present, and future phenotypic  
45 variations (e.g., Ramírez-Villegas *et al.* 2018; Heinemann *et al.*, 2019; Cooper *et al.*, 2014; de los  
46 Campos *et al.*, 2020; Costa-Neto *et al.*, 2021b; Antolin *et al.*, 2021). For plant breeding research, mostly  
47 based on selecting the best-evaluated genotypes for a target population of environments (TPE), this  
48 approach is useful to discriminate genomic and non-genomic sources of crop adaptation. Thus, the  
49 concept of 'envirotyping' (environmental + typing, Cooper *et al.*, 2014; Xu, 2016) emerges to establish  
50 the quality of a given environment in the delivery of quality phenotypic records, mostly to train accurate  
51 predictive breeding approaches capable of guiding the selection of most productive and adapted  
52 genotypes (Resende *et al.*, 2020; Costa Neto *et al.*, 2021a; Crossa *et al.*, 2021).

53 From envirotyping, it is possible to check the quality of a certain environment, which is directly  
54 related to how the observed growing conditions in a particular field trial could be related to the most  
55 frequent environment-types (envirotypes) that occur in the breeding program TPE or target region (e.g.,  
56 Heinemann *et al.*, 2019; Cooper *et al.*, 2021; Antolin *et al.*, 2021). In agricultural research, the quality  
57 of a certain environment is directly related to how it can limit the expression of the genetic potential of  
58 the certain crop for a certain trait, such as suggested by the movement called 'School of de Wit' since  
59 1965 (see Bouman *et al.*, 1996). Thus, for the plant breeding research, this is also direct factors such  
60 as genotype  $\times$  environment interaction (e.g., Allard, 1964; Finlay and Wilkinson, 1963) and its  
61 implications of how the target germplasm under selection (or testing) can perform across the target  
62 growing conditions in which the candidate cultivars will be cropped.

63 Prediction-based tools have leveraged modern plant breeding research to an extent in which  
64 phenotyping is still required (Crossa *et al.*, 2017), although prediction-based tools and simulations can  
65 support more comprehensive and faster selection decisions (Galli *et al.*, 2020; Cooper *et al.*, 2021;  
66 Crossa *et al.*, 2021). One of the most widely used predictive tools is the whole-genome prediction (GP,  
67 Meuwissen *et al.*, 2001), developed and validated for several crop species and application scenarios  
68 (Crossa *et al.*, 2017; Voss-Fels *et al.*, 2019), such as the selection among populations and the prediction  
69 of the performance of single-crosses across multiple environments. For the latter, the most important  
70 use of GP mostly relies on the better use of the available phenotyping records and large-scale easy-  
71 managed genomic information to expand the spectrum of evaluated single-crosses in silico (Messina  
72 *et al.*, 2018; Rogers *et al.*, 2021). Those phenotypic records (e.g., grain yield and plant height) are  
73 collected from existing field trials that experience a diverse set of growing conditions, carrying within  
74 them an intrinsic environment-phenotype covariance. Consequently, the GP has a limited accuracy  
75 under multiple-environment testing (MET) due to genotype  $\times$  environment interaction (G $\times$ E) (Crossa  
76 *et al.*, 2017), meaning that each genotype has a differential response for each environmental factor that  
77 assembles what we call 'environment' (time interval across crop lifetime involving a specific  
78 geographic location and agronomic practice for a particular crop). Therefore, novel ways to include  
79 environmental data (Heslot *et al.*, 2014; Jarquín *et al.*, 2014; Ly *et al.*, 2018; Millet *et al.*, 2019; Gillberg  
80 *et al.*, 2019; Costa-Neto *et al.*, 2021a) and process-based crop growth models (CGM) (Messina *et al.*,  
81 2018; Toda *et al.*, 2020; Robert *et al.*, 2020; Cooper *et al.*, 2021) in GP are considered the best pathways  
82 to fix it. Most of the success achieved by such approaches lies in a better understanding of the visible  
83 ecophysiology interplay between genomics and environment variation (Gage *et al.*, 2017; Li *et al.*,  
84 2018; Guo *et al.*, 2020; Costa-Neto *et al.*, 2021b).

85 The explicit integration of enviromic and genomic sources is an easy way to lead GP to a wide  
86 range of novel applications (Crossa *et al.*, 2021), such as improving the predictive ability for untested

87 growing conditions (Guo *et al.*, 2020; de los Campos *et al.*, 2020; Jarquín *et al.*, 2020; Costa-Neto *et*  
88 *al.*, 2021a), to optimize MET networks and to screen genotype-specific reaction-norms (Ly *et al.*, 2018;  
89 Millet *et al.*, 2019). This is excellent progress for predictive breeding (i.e., the range of prediction-  
90 based selection tools for crop improvement) and accelerating research pipelines to deliver higher yields  
91 and adapted genotypes for target scenarios. However, most of the current studies on this topic vary in  
92 accuracy and applicability, mostly due to (1) the processing protocols used to translate the raw-data  
93 into explicit environmental covariables (ECs) with biological meaning in explaining G×E over  
94 complex traits, (2) the lack of a widely-used envirotyping pipeline that, not only supports the design of  
95 field trials, but also increases the accuracy of the trained GP models and, in addition, (3) for CGM, a  
96 possible limitation is the increased demand for the phenotyping of additional intermediate phenotypes  
97 (i.e., biomass accumulation and partitioning, specific leaf area), which can involve managed iso-  
98 environments and expert knowledge in crop modeling (Cooper *et al.*, 2016; Toda *et al.*, 2020; Robert  
99 *et al.*, 2020). The latter can be expensive or difficult for plant research programs in developing  
100 countries, which generally have low budgets to increase the phenotyping network and install  
101 environmental sensors. In addition, most developing countries are located in regions where  
102 environments are subject to a broader range of stress factors (e.g., heat stress).

103       Therefore, here we revisit Shelford's Law (Shelford, 1931) and other ecophysiology concepts  
104 that can provide the foundations for translating raw-environmental information into an enviromic  
105 source for predictive breeding, hereafter denominated as *enviromic assembly*. The benefits of using the  
106 so-called 'enviromics-aided GBLUP' (E-GP) under existing experimental networks are presented,  
107 followed by the E-GP application to optimize field-based phenotyping. Finally, we benchmark E-GP  
108 with the traditional genomic-best unbiased prediction (GBLUP) to discuss the benefits of enviromic  
109 data to reproduce G×E patterns and provide a virtual screening for yield plasticity.

110

## 111 2 MATERIAL AND METHODS

112 The material methods are organized in the following manner: First, we briefly address the  
113 concepts underlying the novel approach of *enviromic assembly* inspired by Shelford's Law. The data  
114 sets are then presented, along with the statistical models and prediction scenarios used to show the  
115 benefits of large-scale environmental information in GP across multi-environment trials (MET).  
116 Finally, we present a scheme to optimize phenotyping efforts in training GP over MET and support the  
117 screening for maize single-crosses' yield plasticity.

### 118 2.1 Theory: adapting the Shelford Law of Minimum

119 Consider two experimental networks (MET) of the same target population of environments (TPE,  
120 e.g., the different locations, years, and crop management) under different environmental gradients due  
121 to year or location variations (Fig.1). For two genotypes evaluated under both conditions (G1, G2), the  
122 potential genetic-specific phenotypic plasticity (Allard and Bradshaw, 1964) (curves) is expressed as  
123 different reaction-norms (dotted lines), resulting in distinct observable G×E patterns (Fig.1 a-b). In the  
124 former MET (Fig.1a), both genotypes experience a wider range of possible growing conditions (large  
125 interval between the two vertical solid lines), which result in an intricate G×E pattern (crossover).  
126 Conversely, in the latter MET (Fig.1b), the same genotypes experience a reduced range of growing  
127 conditions yet lead to a simple G×E pattern (non-crossover). It is feasible to conclude that, although  
128 the genetic variation is essential for modeling potential phenotypic plasticity of genotypes (curves,  
129 Fig.1a-c), the diversity of environmental growing conditions dictates the observable G×E patterns  
130 (Bradshaw, 1965). Thus, the GP platforms for MET may be unbiased with no diversity, and the quality  
131 of environments is not considered.

132 Approaches such as CGM try to reproduce the phenotypic plasticity curves, while benchmark  
133 reaction-norm models try to reproduce the observable reaction-norm. Both approaches can achieve

134 adequate results, although we have observed that (1) CGM demands greater phenotyping efforts to  
135 train computational approaches capable of reproducing the *achievable* phenotypic plasticity from a  
136 reduced core of phenotypic records from field trials at near-iso environments (e.g., well-watered  
137 conditions versus water-limited conditions for the same planting date and management), (2) CGM  
138 demands additional programing efforts, which, for some regions or crops, can be expensive and limit  
139 the applicability of the method, (3) adequate reaction-norm models over well-designed phenotyping  
140 platforms are not a reality for certain regions of the world with limited resources to invest in precision  
141 phenotyping efforts.

142         We understand that Shelford's Law of Tolerance (Shelford, 1931) is suitable to explain how the  
143 environment drives plant plasticity and can be incorporated into the traditional GP platforms in a cost-  
144 effective way (Fig.1c). It states that a target population's adaptation is modulated as a certain range of  
145 minimum, maximum and optimum threshold limits achieved over an environment gradient (vertical  
146 solid green lines). The genotypes' potential phenotypic plasticity (curves) is not regarded as a linearized  
147 reaction-norm variation across an environmental gradient (Arnold *et al.*, 2019). Instead, it is the  
148 distribution of possible phenotypic expressions dictated by the cardinal thresholds for each biophysical  
149 factor with ecophysiological relevance. Therefore, crops may experience stressful conditions due to  
150 the excess or lack of a target environmental factor, depending on the cardinal thresholds (vertical solid  
151 green lines in Fig.1c), which also rely on some key development stages germplasm-specific  
152 characteristics (e.g., tropical maize versus temperate maize). Consequently, the expected variation of  
153 environmental conditions across different field trials results from a series of environment-types  
154 (envirotypes) acting consistently yet varying in impact depending on the genetic-specific sensibility.  
155 The quality of a certain growing condition depends on the balance between crop necessity and resource  
156 availability, which involves *constant effects*, such as the type of treatments in a trial (e.g., fertilizer  
157 inputs) and *transitory effects* variables, such as weather events (e.g., heat-stress).

158 From these concepts, we observe that with the use of envirotyping (e.g., typing the profiles of a  
159 particular environment), the environment part of the G×E pattern can be visualized based on the shared  
160 frequency of envirotypes among different field trials. Thus, the enviromic of a certain experimental  
161 network or TPE (the core of possible growing conditions) can be mathematically assembled by (1)  
162 collecting large-scale environmental data, (2) processing this raw data in envirotyping entries for each  
163 real or virtual environment, and (3) processing these envirotyping-derived entries to achieve theoretical  
164 relatedness between the buildup of different environments from the shared frequency of envirotypes.  
165 Thus, the expected envirotypes can be designed relying on the adaptation zones inspired by the model  
166 proposed here, based on Shelford's Law, in which we can envisage the process of deriving  
167 environmental covariables for GP into an ecophysiological-smart way.

## 168 **2.2 Proof-of-concept data sets**

169 This study used maize as a proof-of-concept crop due to its importance for food security in  
170 developed and developing regions. Two data sets of maize hybrids (single-crosses of inbred lines)  
171 from different germplasm sources developed under tropical conditions in Brazil (hereafter referred to  
172 as Multi-Regional and N-level) were used. Both data sets involve phenotypic records of grain yield  
173 (Mg per ha) collected across multiple environments. Details on the experimental design, cultivation  
174 practices, and fundamental statistical analysis are given in *Bandeira e Souza et al. (2017)* and *Alves et*  
175 *al. (2019)*. Below we provide a short description of the number of genotypes and environments tested  
176 and the nature of this study's genotyping data.

### 177 *2.2.1 Multi-Regional Set*

178 The so-called "Multi-Regional set" is based on the germplasm developed by the Helix Seeds  
179 Company (HEL) in South America. It includes 247 maize lines evaluated in 2015 in five locations in  
180 three regions of Brazil (Supplementary Table 1). Genotypes were obtained using the Affymetrix Axiom



181 Maize Genotyping Array containing 616 K SNPs (single-nucleotide polymorphisms) (Unterseer *et al.*,  
182 2014). Only SNPs with a minor allele frequency  $> 0.05$  were considered. Finally, a total of 52,811  
183 high-quality SNPs that achieved the quality control level were used in further analysis.

### 184 *2.2.2 N-level set*

185 The so-called "N-level set" is based on the germplasm developed by the Luiz de Queiroz College  
186 of Agriculture of the University of São Paulo (USP), Brazil. A total of 570 tropical maize hybrids were  
187 evaluated across eight environments, involving an arrangement of two locations, two years, and two  
188 nitrogen levels (Supplementary Table 2). This study's sites involved two distinct edaphoclimatic  
189 patterns, i.e., Piracicaba (Atlantic forest, clay soil) and Anhumas (savannah, silt–sandy soil). In each  
190 site, two contrasting nitrogen (N) fertilization levels were managed. One experiment was conducted  
191 under ideal N conditions and received  $30 \text{ kg ha}^{-1}$  at sowing, along with  $70 \text{ kg ha}^{-1}$  in a coverage  
192 application at the V8 plant stage. That is the main recommendation for fertilization in tropical maize  
193 growing environments in Brazil. In contrast, the second experiment under low N conditions received  
194 only  $30 \text{ kg ha}^{-1}$  of N at sowing, resulting in an N-limited growing condition. This set's genotypes were  
195 also obtained using the Affymetrix Axiom Maize Genotyping Array containing 616 K SNPs (Unterseer  
196 *et al.*, 2014) and minor allele frequency  $> 0.05$ . At the end of this process, a total of 54,113 SNPs were  
197 considered in the GP modeling step.

## 198 **2.3 Envirotyping Pipeline**

199 Below, we present the methods used for data collection, data processing, and implementing what  
200 we call 'enviromic assembly'. This envirotyping pipeline was developed using the functions of the R  
201 package *EnvRtype* (Costa-Neto *et al.*, 2021) and is available at no cost. All codes for running the next  
202 steps are given in <https://github.com/gcostaneto/EGP>.



### 203 2.3.1 Environmental sensing (data collection)

204 In this study, environmental information was used for the main abiotic plant-environment  
205 interactions related to daily weather, soil type, and crop management (available only for N-level set).  
206 Daily weather information was collected from NASA POWER (Sparks, 2018) and consisted of eight  
207 variables: rainfall (P, mm day<sup>-1</sup>), maximum air temperature (TMAX, °C day<sup>-1</sup>), minimum air  
208 temperature (TMIN, °C day<sup>-1</sup>), average air temperature (TAVG, °C day<sup>-1</sup>), dew point temperature  
209 (TDEW, °C day<sup>-1</sup>), global solar radiation (SRAD, MJ per m<sup>2</sup>), wind speed at 2 meters (WS, m s<sup>-1</sup> day<sup>-1</sup>)  
210 and relative air humidity (RH, % day<sup>-1</sup>). Elevation above sea level was obtained from NASA's Shuttle  
211 Radar Topography Mission (SRTM). Both sources were imported into R statistical-computational  
212 environments using the functions and libraries organized within the *EnvRtype* package (Costa-Neto *et*  
213 *al.*, 2021b). A third GIS database was used to import soil types from Brazilian soil classification  
214 provided by EMBRAPA and available at <https://github.com/gcostaneto/EGP>.

### 215 2.3.2 Data Processing

216 Quality control was adopted by removing variables outside the mean  $\pm$  three standard deviation  
217 and repeated columns. After checking for outliers, the daily weather variables were used to model  
218 ecophysiological interactions related to soil-plant-atmosphere dynamics. The thermal-radiation  
219 interactions computed potential atmospheric evapotranspiration (ET<sub>0</sub>) following the Priestley-Taylor  
220 method. The slope of the saturation vapor pressure curve (SPV) and vapor pressure deficit (VPD) was  
221 computed as given in the FAO manual (Allen *et al.*, 1998). An FAO-based generic function was used  
222 to estimate crop development as a function of days after emergence (DAE). We assume a 3-segment  
223 leaf growing function to estimate the crop canopy coefficient (K<sub>c</sub>) of evapotranspiration using the  
224 following K<sub>c</sub> values: K<sub>c1</sub> (0.3), K<sub>c2</sub> (1.2), K<sub>c3</sub> (0.35), equivalent to the water demand of tropical maize  
225 for initial phases, reproduction phases, and end-season stages, respectively. Using the same 3-segment  
226 function, we estimate the crop canopy using a leaf area index (LAI) of LAI = 0.7 (initial vegetative

227 phases), LAI = 3.0 (maximum LAI for tropical maize growing conditions observed in our fields), and  
228 LAI = 2.0 (LAI tasseling stage). We computed the daily crop evapotranspiration (ET<sub>c</sub>) estimated by  
229 the product between ET<sub>0</sub> and the K<sub>c</sub> from those two estimations. Then, we computed the difference  
230 between daily precipitation and crop evapotranspiration as P-ET<sub>c</sub>.

231 The apparent photosynthetic radiation intercepted by the canopy (aPAR) was computed  
232 following  $aPAR = SRAD \times (1 - \exp(-k \times LAI))$ , where  $k$  is the coefficient of canopy, considered as 0.5.  
233 Water deficiency was computed using the atmospheric water balance between input (precipitation) and  
234 output of atmospheric demands (crop evapotranspiration). The effect of temperature on the radiation  
235 use efficiency ( $F_{RUE}$ ) was described by a three-segment function based on cardinal temperatures for  
236 maize, using the cardinal temperatures 8°C ( $T_{b1}$ , base lower), 30°C ( $T_{O1}$ , base optimum), 37°C ( $T_{O2}$ ,  
237 upper optimum) and 45°C ( $T_{b2}$ , base upper). This function assumes values from 0 to 1, depending on:  
238  $F_{RUE} = 0$  if  $T_{AVG} \leq T_{b1}$ ;  $F_{RUE} = (T_{AVG} - T_{b1}) / (T_{O1} - T_{b1})$  if  $T_{b1} < T_{AVG} < T_{O1}$ ;  $F_{RUE} = 1$  if  $T_{O1} < T_{AVG} <$   
239  $T_{O2}$ ;  $F_{RUE} = (T_{b2} - T_{AVG}) / (T_{b2} - T_{O2})$  if  $T_{O2} < T_{AVG} < T_{b2}$ ; and  $F_{RUE} = 0$  if  $T_{AVG} > T_{b2}$ .

240 Finally, we sampled each piece of weather and ecophysiological information across five-time  
241 intervals in the crop lifetime: from emergence to the appearance of the first leaf (V1, 14 DAE), from  
242 V1 to the fourth leaf (V4, 35 DAE), from V4 to the tasseling stage (VT, 65 DAE), from VT to the  
243 kernel milk stage (R3, 90 DAE) and from R3 to physiological maturity (120 DAE), in which DAE  
244 stands for days after emergence.

### 245 2.3.3 *Enviromic assembly using typologies (T matrix)*

246 The raw envirotyping data were used to assemble markers for environmental similarity,  
247 depending on the group of the ECs. The first group of ECs involves the transitory effect variables,  
248 which vary in the frequency of occurrence, depending on the crop development cycle. Thus, we design  
249 the expected envirotypes using the number of inputs required to lead crops in at least three levels of

250 adaptation: (1) stress by deficit, (2) optimum growing conditions, and (3) stress by excess. These levels  
251 were defined using cardinal thresholds or frequency tables concerning the growing conditions archived  
252 in the experimental network range. Then, from having reviewed the literature, we consider the intervals  
253 for thermal-related variables: 0°C to 9°C (death), 9.1°C to 23°C (stress by deficit), 23.1°C to 32°C  
254 (optimum growing conditions), 32.1°C to 45°C (stress by excess) and 45°C to ∞°C (death). We  
255 computed the classes for accumulated prediction according to our agronomic expertise on rainfall  
256 requirements for tropical maize growing environments: 0mm to 10mm, 10.1mm to 20mm, and 20.1mm  
257 to ∞ mm. For crop evapotranspiration (ET<sub>c</sub>), we assume the envirotypes 0-6 mm.day<sup>-1</sup>, 7-10 mm.day<sup>-1</sup>,  
258 1, 10-15 mm.day<sup>-1</sup> and 16 to ∞ mm.day<sup>-1</sup>. Finally, for FRUE, we assume the envirotypes based on the  
259 following adaptation zones: impact from 0% to 25% (0-0.25), from 26% to 50% (0.26-0.50), 51% to  
260 75% (0.51-0.75) and 76% to 100% (0.76-1.0). We preferred to adopt a simple discretization for the  
261 remaining variables using a histogram of percentiles (0-25%, 26-50%, 51-75%, 75-100%) of  
262 occurrence for a target envirotype.

263 The second group involves constant effect variables. In this group, we consider the elevation,  
264 crop management, and soil classification in each environment. Soil information was entered as an  
265 incidence matrix (0 or 1) based on each environment's occurrence. In addition, for the N-level set,  
266 nitrogen input levels were computed as two discrete classes: ideal N = 10 and low N = 30; we entered  
267 this same incidence matrix for soil information. Because both sets have a gradient for elevation, we  
268 used a histogram of percentiles (0-25%, 26-50%, 51-75%, 75-100%) as in the transitory group of  
269 variables. Finally, each designed envirotype × time interval frequency was used as a qualitative marker  
270 of environmental relatedness (the hereafter **T** matrix, from typologies).

### 271 2.3.4 Assembly of $W$ matrix using quantile covariables (benchmark EC matrix)

272 The quantitative descriptors of environmental relatedness are the most common method to  
273 include environmental information in GP studies considering reaction-norms. Jarquín *et al.* (2014)  
274 proposed the creation of the so-called environmental relatedness kinship ( $\mathbf{K}_E$ ) carried out with a matrix  
275 of quantitative environmental covariables ( $\mathbf{W}$  matrix, thus we refer to this environment kinship as  
276  $\mathbf{K}_{E,W}$ ). Here, this pattern of similarity in  $\mathbf{K}_{E,W}$  was captured using percentile values (25%; 50%, and  
277 75%) at each of the five-time intervals of development, as suggested by Morais-Júnior *et al.* (2018)  
278 and expanded by Costa-Neto *et al.*, (2021a). We found 255 and 307 quantitative descriptors for the  
279 Multi-Regional and N-level sets at the end of the process, respectively. In this study, we used this  $\mathbf{K}_{E,W}$   
280 as a benchmark method to test the effectiveness of the  $\mathbf{K}_{E,T}$  matrix and the total absence of  
281 environmental information (baseline genomic model without environmental information, see section  
282 2.4.1).

283

## 284 2.4 Statistical Models

285 From a baseline additive-dominant multi-environment GBLUP (section 2.4.1), we tested four  
286 other models, created with the inclusion of two types of enviromic assembly ( $\mathbf{T}$  or  $\mathbf{W}$ ) and structures  
287 for  $\mathbf{G} \times \mathbf{E}$  effects. More details about each statistical model are provided in the next subsections. All  
288 kernel models were fitted using the BGGE R package (Granato *et al.*, 2018) using 15,000 iterations,  
289 with 2,000 used as burn-in and using a thinning of 10. This package was used due to the following  
290 aspects: (1) is an accurate open-source software and; (2) can accommodate many kernels in a  
291 computation-efficient way.

## 292 2.4.1 Baseline additive-dominant GBLUP

293 The baseline model includes a fixed intercept for each environment and random genetic  
 294 variations (additive and dominance). We will refer to this model as GBLUP, which was modeled as an  
 295 overall main effect plus a genomic-by-environment deviation (the so-called G+GE model, Bandeira e  
 296 Souza *et al.*, 2017), as follows:

$$297 \quad \mathbf{y} = \mathbf{1}\boldsymbol{\mu} + \mathbf{Z}_E\boldsymbol{\beta} + \mathbf{Z}_A\mathbf{u}_A + \mathbf{Z}_D\mathbf{u}_D + \mathbf{u}_{AE} + \mathbf{u}_{DE} + \boldsymbol{\varepsilon} \quad (1)$$

298  
 299 where  $\mathbf{y} = [\mathbf{y}_1, \dots, \mathbf{y}_n]'$  is the vector of observations collected in each of the  $q$  environments with  
 300 hybrids and  $\mathbf{1}\boldsymbol{\mu} + \mathbf{Z}_E\boldsymbol{\beta}$  is the general mean and the fixed effect of the environments with incidence  
 301 matrix  $\mathbf{Z}_E$ . Genetic variations are modeled using the main additive effects ( $\mathbf{u}_A$ ), with  $\mathbf{u}_A \sim$   
 302  $N(\mathbf{0}, \mathbf{J}_q \otimes \mathbf{K}_A \sigma_A^2)$ , plus a random dominance variation ( $\mathbf{u}_D$ ), with  $\mathbf{u}_D \sim N(\mathbf{0}, \mathbf{J}_q \otimes \mathbf{K}_D \sigma_D^2)$ , where  $\sigma_A^2$   
 303 and  $\sigma_D^2$  are the variance component for additive and dominance deviation effects;  $\mathbf{Z}_A$  and  $\mathbf{Z}_D$  are the  
 304 incidence matrix for the same effects (absence=0, presence=1),  $\mathbf{J}_q$  is a  $q \times q$  matrix of 1s and  $\otimes$  denotes  
 305 the Kronecker Product. G×E effects are modeled using a block diagonal (BD) matrix of the genomic  
 306 effects, built using  $\mathbf{u}_{AE} \sim N(\mathbf{0}, \mathbf{I}_q \otimes \mathbf{K}_A \sigma_A^2)$  and  $\mathbf{u}_{DE} \sim N(\mathbf{0}, \mathbf{I}_q \otimes \mathbf{K}_D \sigma_D^2)$ , in which  $\mathbf{I}_q$  is a diagonal  
 307 matrix of  $q \times q$  dimension. Residual deviations ( $\boldsymbol{\varepsilon}$ ) were assumed as  $\boldsymbol{\varepsilon} \sim N(\mathbf{0}, \mathbf{I}_n \sigma^2)$ , where  $n$  is the  
 308 number of genotype-environment observations. Furthermore, the genotyping data were processed in  
 309 two matrices of additive and dominance effects, modeled by:

$$310 \quad \mathbf{A} = \{0 = A^2A^2; 1 = A^1A^2; 2 = A^1A^1\} \text{ and}$$

$$311 \quad \mathbf{D} = \{-2f_l^2 = A^2A^2; 2f(1-f_l) = A^1A^2; -2f(1-f_l)^2 = A^1A^1\},$$

312 where  $f_l$  is the frequency of the favorable allele at locus  $l$ . Thus, the genomic-related kinships were  
 313 estimated as follows:

314 
$$\mathbf{K} = \frac{\mathbf{X}\mathbf{X}'}{\text{trace}(\mathbf{X}\mathbf{X}')/\text{nrow}(\mathbf{X})} \quad (2)$$

315 where  $\mathbf{K}$  is a generic representation of the genomic kinship ( $\mathbf{K}_A$ ,  $\mathbf{K}_D$ ),  $\mathbf{X}$  is a generic representation of  
316 the molecular matrix ( $\mathbf{A}$  or  $\mathbf{D}$ ), and  $\text{nrow}(\mathbf{X})$  denotes the number of rows in  $\mathbf{X}$  matrix. Eq (2) was also  
317 used to shape the environmental relatedness kernels using  $\mathbf{T}$  or  $\mathbf{W}$  matrix. This linear kernel for  $\mathbf{K}_E$  was  
318 described by Jarquín *et al.* (2014), which some other authors named it after " $\Omega$ ". Thus, here we only  
319 tested the difference between the enviromic source considered for building it and not the merit of the  
320 kernel method as was done in previous works (Costa-Neto *et al.*, 2021a).

#### 321 2.4.2 GBLUP with enviromic main effects from $\mathbf{T}$ matrix (E-GP)

322 From baseline equation (1), we include a main environmental relatedness effect carried out with  
323 the  $\mathbf{T}$  matrix ( $\mathbf{u}_{E,T}$ ), as follows (Costa-Neto *et al.*, 2021a):

324  
325 
$$\mathbf{y} = \mathbf{1}\mu + \mathbf{Z}_A\mathbf{u}_A + \mathbf{Z}_D\mathbf{u}_D + \mathbf{u}_{AE} + \mathbf{u}_{DE} + \mathbf{u}_{E,T} + \boldsymbol{\varepsilon} \quad (3)$$

326  
327 with  $\mathbf{u}_{E,T} \sim N(\mathbf{Z}_E\boldsymbol{\beta}, \mathbf{K}_{E,T} \otimes \mathbf{J}_p\sigma_{E,T}^2)$ , where  $\mathbf{J}_q$  is a  $p \times p$  matrix of 1s, is  $\mathbf{K}_{E,T}$  the environmental  
328 relatedness created and variance component from the  $\mathbf{T}$  matrix. If non-enviromic sources are  
329 considered, the expected value for environments is given by  $\mathbf{Z}_E\boldsymbol{\beta}$  as the baseline model. In this model,  
330 the  $\mathbf{G} \times \mathbf{E}$  effects are also modeled as the BD genomic matrix. Thus, we refer to this model as "E-GP  
331 (BD)". The kernel of enviromic assembly ( $\mathbf{K}_{E,T}$ ) was built using the panel of envirotype descriptors  
332 ( $\mathbf{T}$ ) in the same way as described in equation (2).

333 From model (3), we substitute the BD for a reaction-norm (RN, Jarquín *et al.*, 2014) based on  
334 the Kronecker product between the enviromic and genomic kinships (Martini *et al.*, 2020) for additive  
335 ( $\mathbf{u}_{AE,T}$ ) and dominance effects ( $\mathbf{u}_{DE,T}$ ):

336

$$337 \quad \mathbf{y} = \mathbf{1}\mu + \mathbf{Z}_A\mathbf{u}_A + \mathbf{Z}_D\mathbf{u}_D + \mathbf{u}_T + \mathbf{u}_{A,T} + \mathbf{u}_{D,T} + \boldsymbol{\varepsilon} \quad (4)$$

338

339 with  $\mathbf{u}_{A,ET} \sim N(\mathbf{0}, \mathbf{K}_{E,T} \otimes \mathbf{K}_A \sigma_{AE,T}^2)$  and  $\mathbf{u}_{D,ET} \sim N(\mathbf{0}, \mathbf{K}_{E,T} \otimes \mathbf{K}_D \sigma_{DE,T}^2)$  where  $\sigma_{AE,T}^2$  and  $\sigma_{DE,T}^2$  are  
 340 the variance components for enviromic  $\times$  additive and enviromic  $\times$  dominance effects performed as  
 341 reaction-norms (Costa-Neto *et al.*, 2021a; Rogers *et al.*, 2021), respectively. For short, this model will  
 342 be named "E-GP (RN)".

#### 343 2.4.3 GBLUP with enviromic main effects from W matrix (W-GP)

344 Finally, in models (4) and (5), we substitute the enviromic assembly derived from  $\mathbf{T}$  by the  
 345 same kernel size derived from  $\mathbf{W}$ , that is, an environmental relatedness with  $\mathbf{u}_{E,W} \sim N(\mathbf{Z}_E\boldsymbol{\beta}, \mathbf{K}_{E,W} \otimes$   
 346  $\mathbf{J}_p \sigma_{E,W}^2)$ , creating two more models:

347

$$348 \quad \mathbf{y} = \mathbf{1}\mu + \mathbf{Z}_A\mathbf{u}_A + \mathbf{Z}_D\mathbf{u}_D + \mathbf{u}_{AE} + \mathbf{u}_{DE} + \mathbf{u}_{E,W} + \boldsymbol{\varepsilon} \quad (5)$$

349 and

$$350 \quad \mathbf{y} = \mathbf{1}\mu + \mathbf{Z}_A\mathbf{u}_A + \mathbf{Z}_D\mathbf{u}_D + \mathbf{u}_{E,W} + \mathbf{u}_{AE,W} + \mathbf{u}_{DE,W} + \boldsymbol{\varepsilon} \quad (6)$$

351

352  $\mathbf{u}_{AE,W} \sim N(\mathbf{0}, \mathbf{K}_{E,W} \otimes \mathbf{K}_A \sigma_{AE,W}^2)$  and  $\mathbf{u}_{DE,W} \sim N(\mathbf{0}, \mathbf{K}_{E,W} \otimes \mathbf{K}_D \sigma_{DE,W}^2)$ , where  $\mathbf{K}_{E,W}$  and  $\sigma_{E,W}^2$  are  
 353 the resulting kinship and the variance components estimated for enviromic assembly from the  $\mathbf{W}$   
 354 matrix, respectively. Thus, for short, models (5) and (6) will be referred to as "W-GP (BD)" and "W-  
 355 GP (RN)", respectively.

356



## 357 **2.5 Study cases for the E-GP platform**

358 In this study, we conceived two cases to highlight the benefits of E-GP to boost efficiency in  
359 prediction-based platforms for hybrid development in maize breeding (Figure 2). The first case (*Case*  
360 *1*) involves predicting the single-crosses from different theoretical existing experimental network  
361 setups, where we dissect the predictive ability over four prediction scenarios. In the second case (*Case*  
362 *2*), we explore a theoretical conception of a super-optimized experimental network using the most  
363 representative combination of genotypes-environments selected using genomics, enviromic assembly,  
364 and genetic algorithms. Below we detail each case studied.

### 365 *2.5.1 Case 1: expanding the existing field trials*

366 In the first case (*Case 1*), we design a novel cross-validation scheme to split the global available  
367 phenotypic information ( $n$ ), from  $p$  genotypes and  $q$  environments, into different training setups.  
368 Consequently, four prediction scenarios were created based on the simultaneous sampling of the  
369 phenotypic information for  $S$  genotypes and  $R$  environments.

- 370 • G, E: refers to the predictions of the tested genotypes within the experimental network (known  
371 genotypes in known environmental conditions). The size of this set is  $n_{[G,E]} = n \times \left(\frac{S}{p}\right) \times \left(\frac{R}{q}\right)$ ;
- 372 •  $nG,E$ : refers to predictions of untested (new) genotypes within the experimental network (known  
373 environmental conditions). The size of this set is  $n_{[nG,E]} = n \times \left(1 - \frac{S}{p}\right) \times \left(\frac{R}{q}\right)$ ;
- 374 •  $G,nE$ : in this scenario, predictions are made under environmental conditions external to those found  
375 within the experimental network. However, there is phenotypic information available within the  
376 experimental network. The size of this set is  $n_{[G,nE]} = n \times \left(\frac{S}{p}\right) \times \left(1 - \frac{R}{q}\right)$ ;

377 •  $n_{G,nE}$ : refers to predicting untested (new) genotypes and untested (new) environmental conditions.

378 This set's size is  $n_{[nG,nE]} = n \times \left(1 - \frac{S}{p}\right) \times \left(1 - \frac{R}{q}\right)$ .

379 Theoretically, if  $R/q = 1$ , then  $n_{[G,nE]} = n_{[nG,nE]} = 0$ , equal to the commonly used CV1 scheme  
380 (prediction of novel genotypes in known environments). Different intensities of  $R/q$  can be sampled,  
381 which permits the testing of different sets of experimental networks. Here we simulated three different  
382 experimental network setups for each tropical maize data set. For the *N-level set*, we made 3/8, 5/8,  
383 and 7/8; for the *Multi-local set* 2/5, 3/5, and 4/5. We assumed the same level of genotype sampling as  
384 the training set for all experimental setups, equal to a fraction of  $\frac{S}{p} = 0.7$ . Each training setup was  
385 randomly sampled 50 times in order to compute the prediction quality statistics. For this purpose, two  
386 statistics were used to assess the statistical models' performance over these training setups. We  
387 calculated Pearson's moment correlation ( $r$ ) between observed ( $y$ ) and predicted ( $\hat{y}$ ) values and used  
388 the average value for each model and training setup as a predictive ability statistic. To check the GP's  
389 ability to replace field trials, we then computed the coincidence (CS, in %) between the field-based  
390 selection and the selection-based selection of the top 5% best-performing hybrids in each environment.

### 391 2.5.2 Case 2: designing super-optimized field trials

392 The second case (*Case 2*) was performed on the optimized training set described below. The first  
393 step was to compute a full-entry G×E kernel, based on the Kronecker product ( $\otimes$ ) between the  
394 enviromic assembly-based relatedness kernel ( $\mathbf{K}_{E,T}$ ,  $q \times q$  environments) and genomic kinship ( $\mathbf{K}_G$ ,  $p$   
395  $\times p$  genotypes), thus  $\mathbf{K}_{GE,T} = \mathbf{K}_{E,T} \otimes \mathbf{K}_G$ , with an  $n \times n$  dimension, in which  $n = pq$ . Here we adopted  
396 the kernel made up for additive effects ( $\mathbf{K}_G = \mathbf{K}_A$ ) as the genomic kinship, despite the benefits of  
397 dominance effects in modeling G×E. We chose to use only  $\mathbf{K}_A$  for simplicity and since additive effects  
398 seems to be a major genomic-related driver of G×E for grain yield in tropical maize (Dias *et al.*, 2018;

399 Alves *et al.*, 2019; Costa-Neto *et al.*, 2021a; Roger *et al.*, 2021), a fact that was also observed for *Case*  
400 *I* (see section 3.1). Later, we applied a single-value decomposition in  $K_{GE,T}$ , following  $K_{GE,T} = UVU^T$   
401 where  $U$  is a total of eigenvalues and  $V$  the respective eigenvectors. The number of eigenvalues that  
402 explains 98% of the variance present in  $K_{GE,T}$  indicate the number of effective SNPs by envirotypes-  
403 marker interactions, which is also the minimum core of genotype-environment combinations ( $N_{GE}$ ).  
404 Thus, the reduced phenotypic information of some genotypes in some environments ( $N_{GE}$ ) was used  
405 to predict a virtual experimental network ( $N_{test}$ ), involving all remaining single-crosses in all available  
406 environments, thus given by  $N_{test} = n - N_{GE}$ ,

407 Following this step, a genetic algorithm scheme using the design criteria  $PEV_{MEAN}$  was used to identify  
408 the  $N_{GE}$  combinations of genotypes in environments within the  $K_{GE,T}$  entries that must be phenotyped  
409 (Misztal, 2016). This optimization was implemented using the *SPTGA* R package (Akdemir and Isidro-  
410 Sánchez, 2019) using 100 iterations: five solutions selected as elite parents were used to generating the  
411 next set of solutions and mutations of 80% for each solution generated.

## 412 **2.6 Virtual screening for yield plasticity**

413 Finally, we tested each GP model's potentials to predict the genotypes' phenotypic plasticity and  
414 stability across environments using only the  $N_{GE}$  phenotypic information. First, the prediction ability  
415 was computed for genotypes by correlating the predicted and observed grain yield values across  
416 environments (Costa-Neto *et al.*, 2021a). The second measure was based on the Finlay-Wilkinson  
417 adaptability model's regression slope (Finlay and Wilkinson, 1963). The GP predicted values were  
418 regressed to the observed environmental deviations, as follows:

$$419 \quad M_{ij} = \bar{y}_i + b_i I_j + \varepsilon_{ij} \quad (7)$$

420 where  $M_{ij}$  is the expected GP-based mean value of grain yield for  $i^{\text{th}}$  genotype at  $j^{\text{th}}$  environment,  $\bar{y}_i$  is  
421 the mean genotypic value for  $i^{\text{th}}$  genotype,  $b_i$  is the genotype plastic response across the mean-centered  
422 standardized environmental score ( $I_j$ ) and  $\varepsilon_{ij}$  is the variety of residual deviation sources not accounted  
423 in the model. After this step, the Pearson's product-moment correlation between GP-based ( $\hat{b}_i$ ) and  
424 phenotypic-enabled estimates were computed as an indicator of the ability to reproduce plastic  
425 responses *in silico* for the  $p$  genotypes. For this, the mean squared error is also calculated as:

$$426 \quad MSE = \sum_{i=1}^p \frac{(b_i - \hat{b}_i)^2}{p}$$

427 All statistics were computed using the entire data sets and only the top 5% of genotypes selected for  
428 each environment. The latter aimed to check the efficiency of the E-GP method to produce high-quality  
429 virtual screenings for plasticity.

## 430 **2.7 Data and Code availability**

431 All data sets and codes (in R) are freely available at <https://github.com/gcostaneto/EGP>.

## 432 **3 RESULTS**

### 433 **3.1 Case 1: Accuracy in predicting diverse G×E scenarios**

434 A cross-validation scheme was designed to assess the predictive ability of the enviromic-aided  
435 approaches in the face of traditional GBLUP. For that, sample genotypes (70%) and environments were  
436 used to compose a drastically sparse training set for MET (training environments/total of  
437 environments). This helped assess the efficiency of E-GP for *Case 1*, in which we were able to dissect  
438 the predictive ability (section 3.2.3) in different scenarios of a scarcity of phenotypic records: novel  
439 genotypes in tested environments ( $nG,E$ ); tested genotypes in untested environments ( $G,nE$ ), and novel

440 genotype and environment conditions ( $nG, nE$ ). Tables 1 and 2 present the N-level and Multi-Regional  
441 sets results, respectively. Then, these results were gathered for both data sets and four prediction  
442 scenarios in order to check for the joint predictive ability analysis (Figure 3).

### 443 3.1.1 Within experimental network (know growing conditions)

444 The predictions within known environmental conditions of a certain experimental network  
445 involve scenarios  $G,E$  and  $nG,E$ . For the  $G,E$  scenario (classical ‘training set’), all models  
446 outperformed the GBLUP in any setups N-level set, and most of the setups of Multi-Regional set. The  
447 highest values of predictive ability were observed for enviromic-aided GP models using the block-  
448 diagonal matrix for  $G \times E$  effects (BD), that is, the E-GP (BD) and W-GP (BD), respectively. Two  
449 general trends were observed: the size of the experimental setup has a small effect on GP models’  
450 accuracy. Secondly, higher accuracy gains were observed for the N-level set (Table 1), with a higher  
451 number of entries (more genotypes and more environments). The accuracy gains in this N level set  
452 ranged from +8% ( $r = 0.83$  for E-GP RN at 7/8 experimental setup), in relation to  $r = 0.77$  (GBLUP),  
453 to +24% ( $r = 0.92$  for W-GP RN at 3/8 experimental setup), in relation to  $r = 0.74$  (GBLUP). In  
454 contrast, for the Multi-Regional set (Table 2), both RN- $G \times E$  models reduced the accuracy (on average,  
455 -3%). For the BD- $G \times E$  models, small gains in accuracy (from +4% to +8%) were observed.

456 That is also a trend for the second prediction scenario ( $nG,E$ ), in which the Multi-Regional set  
457 presented an average gain of 10% for all enviromic-aided GP models with BD- $G \times E$ , and a reduction  
458 of 10% for all RN- $G \times E$  models. Conversely to the previous scenario ( $G,E$ , within the experimental  
459 network, using known genotypes), the  $nG,E$  is one of the most important plant breeding scenarios. It  
460 represents the ability of predict new single-crosses, within the know environmental gradient, borrowing  
461 genomic and enviromic information from the phenotypes of the relatives. Thus, expand the spectrum  
462 of possible genotypes using know growing conditions from the past. For the N-level set, gains up to

463 100% were observed for all enviromic-aided models using any  $G \times E$  structure. No differences were  
464 observed between enviromic-aided models and experimental setups. On average, all enviromic-aided  
465 models achieved a predictive ability of approximately  $r = 0.66$  across all experimental setups (3/8, 5/8,  
466 and 7/8, Table 1). In contrast, the GBLUP model has been impacted with reduced accuracy and a lack  
467 of phenotypic records. The highest gains in predictive ability were observed for scenario 3/8, average  
468 +118% for BD- $G \times E$  models, and +119% for RN- $G \times E$  models.

### 469 *3.1.2 Across experimental network (new growing conditions)*

470 The predictions within new environmental conditions across the experimental network involve  
471  $G, nE$  and  $nG, nE$ . Both scenarios represent the ability of using the available phenotype information  
472 collected from experimental network in order to predict novel growing conditions using genomic or  
473 genomic+enviromic data sources. For the  $G, nE$ , the E-GP models outperformed W-GP and GBLUP  
474 across most experimental setups, despite small differences between the enviromic-aided approaches.  
475 For the E-GP BD at the N-level set (Table 1), the gains in predictive ability ranged from +24% ( $r =$   
476  $0.49$  at 7/8 setup, Table 1), in relation to  $r = 0.40$  (GBLUP), to +35% ( $r = 0.57$  at 5/8 setup), in relation  
477 to  $r = 0.43$  (GBLUP). However, for scenario 3/8, these gains were equal to +10% ( $r = 0.57$ ) in relation  
478 to the +13% archived by the benchmark W-GP RN ( $r = 0.58$ ), both over the  $r = 0.53$  from GBLUP. In  
479 scenario 7/8, W-GP was outperformed by GBLUP, with a reduction in accuracy between -18% and -  
480 16%, where the E-GP made better use of the large phenotypic information available for training GP  
481 models (gains from +20% to +24% over GBLUP). A similar pattern was observed for the Multi-  
482 Regional set (Table 2), in which the gains of E-GP ranged from +4% to +6% across all setups, and W-  
483 GP ranged from -3% to +6% under the same conditions.

484 The second scenario involving novel growing conditions also predicts novel genotypes ( $nG, nE$ )  
485 into account. Thus, all predictions were based on the phenotypic records from reassembled genotypes

486 and considering the environmental similarity conceived from enviromics. With a large experimental  
487 network and genomics, the E-GP models outperformed W-GP and GBLUP when predicting new G×E.  
488 Observed accuracy gains ranged from 33% ( $r = 0.39$  for E-GP RN) to 40% ( $r = 0.42$  for E-GP BD), in  
489 experimental setup 7/8 (Table 1), where GBLUP achieved  $r = 0.30$ , and from 47% ( $r = 0.46$  for E-GP  
490 BD) to 51% ( $r = 0.48$  for E-GP BD), at the experimental setup 5/8, where GBLUP achieved  $r = 0.32$ .  
491 Unlike observations in the other prediction scenarios, the models RN-G×E outperformed BD-G×E in  
492 experimental setups 3/8 (N-Level set) and 2/5 (Multi-Regional set).

### 493 **3.2 Accuracy trends across diverse experimental setups**

494 This section highlights the main target of our *Case 1* study, in which the predictive ability was  
495 achieved using the merged information of scarce genotypes at some environments. Joint accuracy  
496 trends showed that E-GP was useful at increasing GP accuracy (Fig.3a) and explaining the phenotypic  
497 variation sources in both maize data sets (Supplementary Table 3-4). For scenarios with reduced  
498 phenotypic information (e.g., 3/5, 3/8, and 4/8), any model with some degree of environmental  
499 information outperformed the GBLUP for all scenarios. The E-GP approach (purple colors in Figure  
500 3a) better captured envirotpe-phenotype relations and converted them into accuracy gains among  
501 these models. This is also reflected in the E-GP efficiency as a predictive breeding tool capable of  
502 reproducing field-based trials (Fig.3b).

503 Regarding the G×E structures, the contribution of RN-G×E is significant only for drastically  
504 lacking phenotypic records (training setup 3/8), leading to the conclusion that the use of a main-effect  
505 is substantial for most cases E-GP is enough to increase accuracy in GBLUP. For setup 2/5 (Multi-  
506 Regional Set), no differences were observed between all the GP models.

507 The coincidence between the GP-based selection and the in-field selection (CS, %) ranged from  
508 ~35% to ~50%, in models with some environmental information, while it ranged between 30% and



509 40% for GBLUP (without environmental information). For the E-GP approach accounting for a wide  
510 number of phenotypic records in the training set (7/8, 3/5, and 4/5), values of CS up to 55% were found.  
511 Among these models, it seems that the RN-G×E reduces the CS estimates concerning the BD-G×E  
512 based models. Considering both figures 3a and 3b, it is possible to suggest that predictive ability does  
513 not imply an increase of CS, that is, in the power of selecting the best performing genotypes in certain  
514 environments. However, the drastic increase in the E-GP accuracy in relation to the other models leads  
515 us to infer that despite the lower rise in CS, the E-GP models are useful when predicting GE for a vast  
516 number of single-crosses.

### 517 **3.3 Case 2: enviromic assembly with optimized training sets for genomic prediction**

518 Those results lead us to investigate *Case 2* (Fig.2), where we checked the possibility of training  
519 efficient and biologically accurate GP scenarios from super-optimized training sets. Then, we checked  
520 the potential of using these optimized field trials for predicting novel G×E under the so-called “virtual  
521 experimental networks”. This approach were implemented by combining two selective phenotyping  
522 approaches (Miształ, 2016; Akdemir and Isidro-Sánchez, 2019), aiming to identify combinations of  
523 genotypes and environments using in-silico representations of the enviromic assembly × genomic  
524 kinships.

#### 525 **3.3.1 Predicting G×E at virtual experimental networks**

526 The process of designing virtual networks in maize hybrid breeding involved two steps  
527 (Supplementary Fig 1). First, we used a single-value decomposition (SVD)-based algorithm to select  
528 the effective number of individuals ( $N_{GE}$ ) (Miształ, 2016) representing at least 98% of the variation of  
529  $\mathbf{K}_{G,ET}$ . It was done in  $\mathbf{K}_{G,ET}$  because this kernel represents an in-silico representation of envirotypes  
530 and genotypes (Akdemir and Isidro-Sánchez, 2019). Under sparse MET conditions, it led to a training

531 size equal to  $N_{GE} = 67$  and  $N_{GE} = 49$  for the N-level set ( $n = 4,560$ ) and Multi-Regional set ( $n = 1,235$ ),  
532 respectively. It represents only 1.5% and 4% of the whole experimental network; Supplementary Fig.  
533 2-3. For didactic purposes, from here onwards, we will represent the values of  $N_{GE}$  as the training set  
534 size/number of genotypes.

535 We also checked the use of all environments, although the accuracy differences were tiny in relation  
536 to this sparse MET scenario (Table 3). Furthermore, small differences were achieved by E-GP and W-  
537 GP models with BD-G×E, but both higher than RN-G×E and GBLUP (Fig 4). Major differences were  
538 highlighted as follows:

- 539 • For within-field trials, predictive ability ranged from  $r = 0.76$  (W-GP) to  $r = 0.87$  (E-GP);
- 540 • For virtual-networks, it ranged from  $r = 0.14 \pm 0.11$  (GBLUP) to  $r = 0.60 \pm 0.06$  (E-GP);
- 541 • In virtual-networks, the predictive ability of models trained with drastically reduced phenotypic  
542 records ranged from  $r = 0.10$  (GBLUP,  $N_{GE} = 67/4560$ ) to  $r = 0.58$  (E-GP,  $N_{GE} = 67/4560$ ) and  
543  $r = 0.18$  (GBLUP,  $N_{GE} = 49/1235$ ) to  $r = 0.81$  (E-GP,  $N_{GE} = 49/1235$ ).

544 The predictive ability was computed considering only the top 5% of genotypes in each environment  
545 and data set. The objective was to verify if the GP approaches could adequately predict the performance  
546 of the best-evaluated genotypes in the field. For the Multi-Regional set, the predictive ability ranged  
547 from  $r = 0.098$  (GBLUP,  $N_{GE} = 210/1235$ ) to  $r = 0.579$  (W-GP BD,  $N_{GE} = 49/1235$ ) and  $r = 0.578$  (E-  
548 GP BD,  $N_{GE} = 49/1235$ ); For the N-level set, W-GP outperformed E-GP, leading to  $r = 0.554$  (W-GP  
549 BD,  $N_{GE} = 536/4560$ ) in front of  $r = 0.554$  (E-GP RN,  $N_{GE} = 67/4560$ ) but with less phenotyping data.  
550 In contrast, the best E-GP model at the higher number of genotypes and environments evaluated in the  
551 field  $r = 0.484$  (E-GP RN,  $N_{GE} = 536/4560$ ) were outperformed by the same model, yet with less  
552 phenotyping data  $r = 0.554$  (E-GP RN,  $N_{GE} = 67/4560$ ). For GBLUP, the effective size of the training  
553 set was important, ranging in predictive ability from  $r = 0.070$  ( $N_{GE} = 67/4560$ ) to  $r = 0.152$  ( $N_{GE} =$

554 536/4560). The result of both sets suggests that when using enviromic-aided approaches, the use of  
555 fewer amounts of, but more representative, phenotyping information is better than more amounts of,  
556 yet less representative, phenotyping data.

557 Figure 4 was created using the average values of Table 3. This figure shows that the optimization  
558 was more effective for growing conditions contrasting across macro-regions (Fig. 4a) than for  
559 experimental networks involving fewer locations (Fig. 4b). Notably, it is possible to drastically reduce  
560 field costs for experimental networks conducted across diverse locations. However, for screening  
561 management conditions, greater precautions must be considered with the use of E-GP.

### 562 *3.3.2 Predicting genotype-specific plasticity and environmental quality*

563 In this step, we checked these models' ability to produce virtual screenings for yield plasticity  
564 (Fig.5). We used the Finlay-Wilkinson method (FW, Eq. 7) over the predicted GY means of each  
565 genotype  $i$  in environment  $j$  ( $M_{ij}$ ). Hence, we compared the ability of E-GP in the prediction of: (1)  
566 individual genotypic responses across environments, (2) the gradient of environmental quality ( $h_j$ ),  
567 and (3) the plasticity coefficient ( $b_1$ ) of the FW model describing the rate of responsiveness to  $h$ . The  
568 results in Fig 5 involves a joint analysis of both data sets.

569 All models that included some degree of enviromic assembly outperformed the GBLUP-based  
570 approach when predicting individual genotype responses across the MET (Fig 5a). The median values  
571 of  $r$  ranged from  $r=0.17$  (GBLUP), in which 45% of the genotypes were not well predicted (red colors),  
572 to  $r = 0.83$  (E-GP), in which up to 60% of the genotypes were very well predicted (purple colors). The  
573 inclusion of any enviromic assembly and G×E structure led to drastic gains in accuracy for a particular  
574 genotype response across contrasting (and unknown) G×E conditions (gains up to ~378%). However,  
575 the BD structure outperformed RN in terms of resolution (many purple colors in Fig 5a). A major part

576 of the accurately predicted performance of genotypes across environments ranged from  $r = 0.75$  to  $r$   
577  $=1.0$ . Due to this, for the next figures, we plotted only the E-GP considering the BD-G×E structure.

578 GBLUP was unable to correctly reproduce  $h_j$  for an in-silico study using the FW model (Fig.5b).  
579 We observe that E-GP better describes the  $h_j$  gradient (mean-centered average values of GY for each  
580 environment), with  $r$  near to 1 (correlation between observed and predicted environmental quality) also  
581 suggesting a low bias ( $slope = 0.924$  between observed and predicted values). Consequently, this was  
582 reflected in the quality of yield plasticity predictions (Fig.5c-e), as yield plasticity was represented as  
583 linear responsiveness over the environmental variation. The graphical representation of genotype-  
584 specific linear reaction norms dictated by the linear regression slope ( $b_1$ ) was likely more similar to E-  
585 GP than GBLUP about those observed in field-based testing (Fig 5b). The accuracy for  $b_1$  ranged from  
586  $r = 0.08$  (GBLUP) to  $r = 0.43$  (E-GP), an increase of 437%.

#### 587 **4 DISCUSSION**

588 Large-scale envirotyping, or simply enviromics, is an emerging field of data science in  
589 agricultural research and modern breeding program routines. We demonstrated that enviromics is the  
590 science capable of bringing together environment information and quantitative genomics into an  
591 ecophysiology-smart manner. In this study, we presented the first report on (1) the use of Shelford's  
592 Law to guide the assembly of the enviromics for predictive breeding purposes over experimental  
593 networks; (2) the integration of enviromic assembly-based kernels with genomic kinship into  
594 optimization algorithms capable of designing selective phenotyping strategies and (3) a break of the  
595 paradigm relying on the fact that phenotyping a higher number of genotypes at higher number of  
596 environments do not always contribute to increasing the accuracy of GP for contrasting G×E scenarios,  
597 but there are pieces of evidences suggesting that enviromics increases accuracy under sparse multi-  
598 environment networks; (4) report that the process of deriving markers of environmental relatedness,

599 here named 'enviromic assembly', is crucial for the implementation of low-cost GP platforms over  
600 multi-environmental conditions.

601 In this study, we also envisage that the process of enviromic assembly is supported by a strong  
602 theoretical background in ecophysiology, illustrating the potential uses of environmental information  
603 to increase the accuracy of predictive breeding for yield and plasticity. Our results indicate that the E-  
604 GP platform (Figure 2) can fit two types of prediction scenarios in plant breeding programs: (1) better  
605 use of the available phenotypic records to train more accurate GP models capable of aiding the selection  
606 of genotypes across multi-environmental conditions and (2) a method that reduces costs for field-based  
607 testing and enables an early screening for yield plasticity under crossover G×E conditions.  
608 Furthermore, we show that any model with some degree of enviromic assembly (by typology or  
609 quantitative descriptors) is always better to reproduce the genotypes' environmental quality of field  
610 trials and phenotypic plasticity.

611 Below we discuss the aspects that support the use of E-GP for multi-environment predictions,  
612 involving the importance of breaking the paradigm that states that enviromics are not necessary to  
613 predict G×E accurately. We then discuss how the genomic and enviromic sources are linked in the  
614 phenotypic records collected from the fields and how this type of knowledge can improve the quality  
615 of the prediction-based pipelines for crop improvement. Finally, we envisage possible environmental-  
616 assembly applications supporting other predictive breeding fields, such as optimizing crop modeling  
617 calibration and how it can couple a novel level of climate-smart solutions for crop improvement as  
618 anticipating the plasticity of a large number of genotypes using reduced phenotypic data.

#### 619 **4.1 Why are enviromics important for multi-environment genomic prediction?**

620 Genomic prediction (GP) platforms were first designed to model the *genotype-to-phenotype*  
621 relations under single environment conditions, e.g., in a breeding program nursery (Lorenzana and

622 Bernardo, 2009; Windhausen *et al.*, 2012; Zhao *et al.*, 2012; Zhang *et al.*, 2015). Under these  
623 conditions, the micro-environmental variations within breeding trials (e.g., spatial gradients in soil  
624 properties) are minimized in the phenotypic correction step by separating useful genetic patterns and  
625 experimental noises (non-genetic patterns). However, those phenotypic records carry the indissoluble  
626 effects of macro-environmental fluctuations of certain weather and soil factors that occurred during  
627 crop growth and development (Li *et al.*, 2018; Vidotti *et al.*, 2019; Millet *et al.*, 2019; Guo *et al.*, 2020;  
628 Jarquín *et al.*, 2020). That seems to be of no concern when predicting novel genotypes under these  
629 same growth conditions (the CV1 scheme for single-environment models) yet becomes noise for multi-  
630 environment prediction scenarios. It is a consequence of the macro-environment fluctuations in the  
631 lifetime of the crops (Allard and Bradshaw, 1964; Bradshaw, 1965; Arnold *et al.*, 2019), responsible  
632 for modulating the rate of gene expression (e.g., Jończyk *et al.*, 2017; Liu *et al.*, 2020) and fine-tuning  
633 epigenetic variations and related to transcriptional responses (e.g., Vendramin *et al.*, 2020; Cimen *et*  
634 *al.*, 2021).

635 For each unit that we call "environment" (field trial at the specific year, location, planting date,  
636 and crop management), there are various environmental factors such as water availability, canopy  
637 temperature, global solar radiation, and nutrient content in the soil. The expression of some genotype  
638 in some phenotype is then limited by the certain key environmental factors, acting in different levels  
639 of crop development as preconized by School of de Wit' since 1965 (see Bouman *et al.*, 1996).  
640 However, we revisited the Shelford's theory, which suggests that a population's fitness is given by the  
641 amount and distribution of resources available for its establishment and adaptation (Shelford, 1931).  
642 Thus, we reinterpret this concept by assuming that the relation between input availability (deficit,  
643 optimum amount, or excess) across different crop development stages drives the amount of the genetic  
644 potential expressed in phenotypes produced by the same genotype for a given environment. Therefore,  
645 it provides the foundations to elaborate the argument that there is also an indissoluble *envirotypes*-

646 *phenotype covariance* in the phenotypic records that is interpreted as a G×E interaction for each  
647 environment. Because of that, we envisage that any environmental relatedness kernel must account for  
648 it in any way.

649 The pioneer approaches to measuring crop adaptability use the average value of a given trait in  
650 a given environment as an environmental quality index (e.g., Finlay and Wilkinson, 1963). However,  
651 the problem with this approach is that it explains the quality of the environment realized by the  
652 genotypes evaluated in it, making it inefficient to explain the drivers of environmental quality and  
653 incapable of predicting untested growing conditions, as observed in our results for *Case 2* using  
654 GBLUP without enviromic data. In addition, our results for *Case 1* highlight that it is a limit in accuracy  
655 for traditional GBLUP across MET, in which the accuracy remains almost the same, regardless of the  
656 number of phenotypic records available.

657 A second intrinsic covariance can interpret this last result within the phenotypic records, which  
658 is the *genotype-envirotpe covariance*. By adapting the Quantitative Genetics theory to the terminology  
659 used here, we can infer that each genotype reacts differently to each envirotpe, resulting in a given  
660 phenotype. This phenotype is then used to provide small crop phenology differences (genetically  
661 determined window sizes for each development stage). Recent but pioneer works have been carried  
662 out to understand the genetic and environmental determinants of flowering time in sorghum (Li *et al.*,  
663 2018) and rice (Guo *et al.*, 2020). That can be indirectly interpreted as cardinal differential thresholds  
664 for temperature response. Jarquín *et al* (2020) proved that it is possible to increase the ability of GP in  
665 predictive novel G×E by coupling information of day-length in the benchmark GP models. For all these  
666 examples reported above, we can infer that, when trying to predict a novel genotype, by borrowing  
667 genotypic information from the relatives at different environments, it is impossible to reproduce the  
668 genotype-envirotpe covariance without adding any enviromic information into the model.



669           The presence of both *genotype-envirotypes* and *envirotypes-phenotypes* covariances might explain  
670 the gains in the predictive ability due to the use of multi-environment GP models in contrast to single-  
671 environment GP models (Bandeira e Souza *et al.*, 2017; de Oliveira *et al.*, 2020) and why deep learning  
672 approaches have successfully captured intrinsic G×E patterns and translated them into gains in  
673 accuracy (Montesinos-López *et al.*, 2018; Crossa *et al.*, 2019; Cuevas *et al.*, 2019). Conversely, this  
674 also might explain the need to incorporate secondary sources of information in the prediction of grain  
675 yields across multiple environments (Westhues *et al.*, 2017; Ly *et al.*, 2018; Millet *et al.*, 2019; Costa-  
676 Neto *et al.*, 2021a; 2021b; Jarquín *et al.*, 2020), as well as the possible limitations of CGM approaches  
677 contrasting scenarios differing from those targeted near-iso conditions of CGM calibration (e.g.,  
678 Cooper *et al.*, 2016; Messina *et al.*, 2018). Thus, an alternative can be supervised approaches to  
679 describe the environmental relatedness, such as in this paper, and perhaps unsupervised algorithms  
680 capable of taking advantage of the covariances related to the genotype-phenotype, genotype-  
681 envirotypes, and envirotypes-phenotype dynamics.

#### 682 **4.2 Sometimes main-effect enviromics is better than reaction-norm models**

683           Our results from *Case 1* show that the inclusion of enviromic sources (for main-effects or  
684 explicitly incorporated in the RN-G×E structure) led to a better description of the envirotypes-phenotype  
685 covariances, which was reflected in accuracy gains. At our data and Bayesian approach used, it is worth  
686 highlighting that incorporating enviromic sources does not replace the incorporation of a design matrix  
687 for environments (here used as fixed effects) as it is commonly associated in previous studies of GP  
688 reaction-norm. Here we show that enviromic sources came up as tentative to capture the envirotypes-  
689 phenotype covariances. The cross-validation scheme used in *Case 1* allowed us to observe that the joint  
690 prediction of different genotype-environment conditions (Fig 3) might better highlight how enviromic  
691 sources can contribute to increasing the predictive ability of GP, mostly due to its usefulness in  
692 approaching the environmental correlation among field trials. It shows more transparency for the

693 influence of the scenarios  $G,nE$  and  $nGnE$ , in which we had a considerable lack of phenotypic  
694 information in training GP. We can infer that schemes such as CV1 (only  $nG,E$ ) are the least adequate  
695 option to show the benefits of coupling enviromics in GBLUP. However, looking at a drastically sparse  
696 MET condition (joint prediction scenarios) shows that enviromics improves the accuracy of GP as the  
697 size of the MET also increases. Predictions are made up of tiny experimental networks.

### 698 **4.3 Differences in using environmental covariables (**W**) and typologies (**T**)**

699 Regarding the enviromic assembly approaches used in this study, there was evidence that using  
700 typologies as envirotype descriptors (**T** matrix) is more biologically accurate in representing  
701 environmental relatedness than quantitative descriptors (**W** matrix) based on quantile covariables. This  
702 increase in biological accuracy was reflected in the statistical accuracy and then boosted plant breeders'  
703 ability to carry out selections across multi-environment conditions. Further efforts in this sense must  
704 be devoted to increasing the level of explanation of the genotype-envirotype covariances, which can  
705 also take advantage of Shelford's Law to refine the limits of tolerance for particular genotypes. Thus,  
706 different genotypes will be under the influence of a diverse set of envirotypes, which can be realized  
707 for the same environmental factor (e.g., solar radiation, air temperature, soil moisture) according to its  
708 occurrence across crop lifetime (e.g., vegetative stage) and the adaptation zone designed from  
709 ecophysiology concepts (e.g., temperature cardinals defining which temperature level results in stress  
710 and optimum growing condition).

711 A second difference may be explained by the fact that quantitative environmental covariates are  
712 not an additive effect to compose an environment variation. Despite this, we agree with Resende et al.  
713 (2020), and we adapted the idea of envirotypes as markers of environment relatedness in a different  
714 manner. For example, the common use of mean values of covariates such as rainfall, solar radiation,  
715 and air temperature, in reality, represents a non-additive between each other; yet, they are very well

716 correlated for a given site-planting date condition, even when using strategies to deal with collinearity,  
717 such as partial least squares (e.g., Vargas *et al.*, 2006; Porker *et al.*, 2020;). We can use an example as  
718 a given day of crop growing in which a large amount of rainfall has occurred. We can suppose that the  
719 sky is cloudy, with less radiation and lower temperature. Thus, using such G-BLUP inspired approach  
720 is not an ideal solution to estimate the environmental variance. Conversely, the environmental  
721 typologies (**T**) are based on frequencies (ranging from 0 to 1), where the sum of all frequencies are  
722 equal to 1 (100% of the variation). In addition, those typologies can be built for a given site using  
723 historical weather data, adapting the approach of Gillberg *et al.* (2019) and de los Campos *et al.* (2020).  
724 As presented in section 2.4.2, if no typologies are considered, the expected environment effect is given  
725 for a fixed-environment intercept (with 0 variance within and between environments). Despite this fact,  
726 another option is using nonlinear kernel methods to estimate only the environment-relatedness, as this  
727 approach takes advantage of nonlinear relationships among covariates (Costa-Neto *et al.*, 2021a,b).

#### 728 **4.4 Does more phenotype data mean more accuracy in multi-environment prediction?**

729 This study shows that environmental information can break the paradigm that claims that more  
730 phenotype information leads to greater accuracy of GP models over MET. Our results highlight that  
731 the traditional GBLUP models assume that the variation due to  $G \times E$  is purely genomic-based across  
732 field trials, leading to an implicit conclusion that the yield plasticity is constant (slope  $\sim 0$ ) for all  
733 genotypes, which is unrealistic. It also reflects that  $G \times E$  patterns are non-crossover (scale changes in  
734 performance across different variations), that is, a well-performing genotype will always be good  
735 across environments, and a poorly performing genotype has the same trend for all environments.  
736 Despite the gains achieved in predicting the quality of a novel environment and the plasticity for tested  
737 and untested genotypes, we noticed that the inclusion of enviromic sources also leads to the unrealistic  
738 conclusion that all genotypes respond in the same way the gradient of climate and soil quality. Our  
739 results show a reasonable accuracy in predicting yield plasticity, but further efforts must be made to

740 improve this approach's explanation of the yield plasticity as a nonlinear variation across the gradient  
741 of environmental factors.

742 The use of selective phenotyping strategies made up with enviromic assembly  $\times$  genomic  
743 kinships showed a drastic reduction of in-field efforts. Combined with enviromic-aided GBLUP  
744 models, it led to almost the same predictive ability achieved using a wide number of genotypes and  
745 environments for a large experimental network. Thus, we can enumerate the benefits of the enviromic  
746 approaches tested in this study as (1) the possibility of training prediction models for yield plasticity  
747 with reduced phenotyping efforts, (2) a consequence of the assembly of enviromics with genomics  
748 allowing the selection of the genotype-environment combinations that best represents the main inner  
749 covariances among phenotypes produced by different environments (the genotype-phenotype,  
750 envirotpe-phenotype dynamics mentioned above).

751 Considering both enviromics approached, we conclude that the advantages of E-GP over W-GP  
752 can be enumerated as (1) the flexibility to design a wide number of environment-types assuming  
753 different frequencies of occurrence of key stressful factors in crop development; (2) it allows the use  
754 of historical weather and in-field records to compute trends of certain envirotypes at certain  
755 environments, which can be coupled into (3) the definition of TPE and characterization of mega-  
756 environments, as the main approach used for this relies on the study of the frequency of occurrence of  
757 the main environment-types (e.g., Heinemann *et al.*, 2019). For the latter, for example, the **T** matrix  
758 proposed here is just an arrangement of an environment  $\times$  typology matrix, in which each entry  
759 represents its frequency of occurrence at a particular time interval of the crop lifetime. Conversely, the  
760 advantages of W-GP over E-GP rely on plasticity in creating large-scale envirotpe descriptors with  
761 reasonable biological accuracy.

762

## 763 **4.5 Can we envisage climate-smart solutions from enviromics with genomics?**

764 Modern plant breeding programs must deliver climate-smart solutions cost-effectively and time-  
765 reduced (Crossa *et al.*, 2021). By climate-smart solutions, we mean (1) adopting cost-effective  
766 approaches capable of providing fast and cheap solutions to face climate change (2) a better resource  
767 allocation for field trial efforts to collect representative phenotype information to feed prediction-based  
768 platforms for crop improvement, such as training accurate GP models and CGM-based approaches  
769 capable of guiding several breeding decisions, (3) a better understanding of which envirotypes most  
770 limit the adaptation of crops across the breeding TPE, revising historical trends and expecting future  
771 scenarios (e.g., Ramirez-Villegas *et al.*, 2018; 2020; Heinemann *et al.*, 2019) (4) understanding the  
772 relationship between secondary traits and their importance in explaining the plant-environment  
773 dynamics for given germplasm at given TPE (e.g., Cooper *et al.*, 2021). However, most of those  
774 objectives will be hampered if the MET-GP platforms do not consider models with a higher biological  
775 meaning (Hammer *et al.*, 2019) and reliable environmental information. A cost-effective solution for  
776 that, if the breeder has no access to sensor network tools, relies on the use of remote sensing tools to  
777 collect and process basic weather and soil data, such as those available in the *EnvRtype* R package  
778 (Costa-Neto *et al.*, 2021b).

779 If selective phenotyping is added in the enviromics-aided pipeline for GP (Supplementary Fig  
780 1), additional traits and the possibility of screening genotypes across a wide number of managed  
781 environments will increase. It can support field trials' training for CGM approaches, which demands  
782 phenotyping of traits across crop life, such as biomass accumulation and partitioning among different  
783 plant organs. Finally, using models considering an explicit environmental gradient of key-  
784 environmental factors is a second alternative for this approach. It can be done to discover the genetic  
785 determinants of the interplay between plant plasticity and environment variation. As a wide range of  
786 genes reacts to each gradient of environmental factors, the use of whole-genome regressions of

787 reaction-norm for each environmental factor must be useful to screen potential genotypes (in our case,  
788 single-crosses) for a diverse set of scenarios (e.g., increased heat stress). Pioneer works used this  
789 methodology in wheat breeding (Heslot *et al.*, 2014; Ly *et al.*, 2018) inspired other cereal crop  
790 applications.

791 For example, Millet *et al.* (2019) fine-tuned the methodology by creating a two-stage analysis of  
792 factorial regression (FR) involving environmental data, followed by a GP based on the genotypic-  
793 specific sensibility for key environmental factors found in the FR step. In general, studies involving  
794 FR analysis found that the effect of high temperatures at grain-filling and maturation (Epinat-Le Signor  
795 *et al.*, 2001; Romay *et al.*, 2010), water balance at flowering (Epinat-Le Signor *et al.*, 2001; Millet *et*  
796 *al.*, 2019) and intercept radiation at the vegetative phase (Millet *et al.*, 2019) are the main drivers of  
797 G×E for yield components in maize. Thus, Millet *et al.* (2019) explores this opportunity offered by FR  
798 to use genotypic-specific regressions, which coupled with genomic data, led to an increase of the  
799 accuracy of MET-GP by 55% concerning the benchmark environmental similarity model made up of  
800 mean values of environmental factors, as proposed by Jarquín *et al.* (2014).

801 From the aspects mentioned above, we envisage that the use of GP for multi-environment  
802 predictions must account for some degree of ecophysiological reality while also considering the  
803 balance and the relation between parsimony and accuracy (Hammer *et al.*, 2019; Costa-Neto *et al.*,  
804 2021b; Cooper *et al.*, 2021). Here we also highlight in our literature review that multi-environment GP  
805 must account for the impact of (1) resource availability in the creation of biologically accurate  
806 platforms in training CGM-based approaches and delivering reliable envirotyping information for  
807 those purposes, (2) availability of the knowledge of experts in training CGM approaches. Thus,  
808 ecophysiology concepts to provide solutions for raw environmental data processing in enviromic  
809 assembly information for predictive purposes seem to be a cost-effective alternative to leverage  
810 accuracy involving parsimony and biological reality.

811 **5 REFERENCES**

- 812 Allard, R. W., and Bradshaw, A. D. (1964). Implications of genotype-environmental interactions in applied  
813 plant breeding. *Crop Sci.* 4, 503–508.
- 814 Allen, R. G., Pereira, L. S., Raes, D., and Smith, M. (1998). *Crop Evapotranspiration – guidelines for*  
815 *computing crop water requirements*. 56th ed. Rome: FAO Irrigation and Drainage Paper N° 56.
- 816 Antolin, L. A. S., and Heinemann, A. B. (2021). Impact assessment of common bean availability in Brazil  
817 under climate change scenarios. 191. doi:10.1016/j.agsy.2021.103174.
- 818 Arnold, P. A., Kruuk, L. E. B., and Nicotra, A. B. (2019). How to analyse plant phenotypic plasticity in  
819 response to a changing climate. *New Phytol.* 222, 1235–1241. doi:10.1111/nph.15656.
- 820 Alves, F. C., Granato, Í. S. C., Galli, G., Lyra, D. H., Fritsche-Neto, R., and De Los Campos, G. (2019).  
821 Bayesian analysis and prediction of hybrid performance. *Plant Methods* 15, 1–18. doi:10.1186/s13007-  
822 019-0388-x.
- 823 Akdemir, D., and Isidro-Sánchez, J. (2019). Design of training populations for selective phenotyping in  
824 genomic prediction. *Sci. Rep.* 9, 1–15. doi:10.1038/s41598-018-38081-6.
- 825 Bandeira e Souza, M., Cuevas, J., Couto, E. G. de O., Pérez-Rodríguez, P., Jarquín, D., Fritsche-Neto, R., et  
826 al. (2017). Genomic-Enabled Prediction in Maize Using Kernel Models with Genotype × Environment  
827 Interaction. *G3* 7, g3.117.042341. doi:10.1534/g3.117.042341.
- 828 Bournan, B. A. M., Keulen, H. Van, and Rabbingeh, R. (1996). The 'School of de Wit' Crop Growth  
829 Simulation Models : A Pedigree and Historical Overview. 52.
- 830 Bradshaw, A. D. (1965). Evolutionary significance of phenotypic plasticity in plants. *Adv. Genet.* 13, 115–  
831 155.
- 832 Cimen, E., Jensen, S. E., and Buckler, E. S. (2021). Building a tRNA thermometer to estimate microbial  
833 adaptation to temperature. *Nucleic Acids Res.* 48, 12004–12015. doi:10.1093/nar/gkaa1030.
- 834 Cooper, M., Messina, C. D., Podlich, D., Totir, L. R., Baumgarten, A., Hausmann, N. J., et al. (2014).  
835 Predicting the future of plant breeding: Complementing empirical evaluation with genetic prediction.  
836 *Crop Pasture Sci.* 65, 311–336. doi:10.1071/CP14007.
- 837 Cooper, M., Technow, F., Messina, C., Gho, C., and Radu Totir, L. (2016). Use of crop growth models with  
838 whole-genome prediction: Application to a maize multi-environment trial. *Crop Sci.* 56, 2141–2156.  
839 doi:10.2135/cropsci2015.08.0512.
- 840 Cooper, M., Powell, O., Voss-Fels, K. P., Messina, C. D., Gho, C., Podlich, D. W., et al. (2021). Modelling  
841 selection response in plant-breeding programs using crop models as mechanistic gene-to-phenotype  
842 (CGM-G2P) multi-trait link functions. *in silico Plants* 3, 1–21. doi:10.1093/insilicoplants/diaa016.
- 843 Cortés, A. J., Restrepo-Montoya, M., and Bedoya-Canas, L. E. (2020). Modern Strategies to Assess and Breed  
844 Forest Tree Adaptation to Changing Climate. *Front. Plant Sci.* 11. doi:10.3389/fpls.2020.583323.



- 845 Costa-Neto, G., Fritsche-Neto, R., and Crossa, J. (2021a). Nonlinear kernels, dominance, and envirotyping  
846 data increase the accuracy of genome-based prediction in multi-environment trials. *Heredity (Edinb)*.  
847 126, 92–106. doi:10.1038/s41437-020-00353-1.
- 848 Costa-Neto, G., Galli, G., Carvalho, H. F., Crossa, J., and Fritsche-Neto, R. (2021b). EnvRtype: a software to  
849 interplay enviromics and quantitative genomics in agriculture. *G3 Genes|Genomes|Genetics*.  
850 doi:10.1093/g3journal/jkab040.
- 851 Crossa, J., Pérez-Rodríguez, P., Cuevas, J., Montesinos-López, O., Jarquín, D., de los Campos, G., et al.  
852 (2017). Genomic Selection in Plant Breeding: Methods, Models, and Perspectives. *Trends Plant Sci.* 22,  
853 961–975. doi:10.1016/j.tplants.2017.08.011.
- 854 Crossa, J., Martini, J. W. R., Gianola, D., Pérez-Rodríguez, P., Jarquin, D., Juliana, P., et al. (2019). Deep  
855 Kernel and Deep Learning for Genome-Based Prediction of Single Traits in Multienvironment Breeding  
856 Trials. *Front. Genet.* 10, 1–13. doi:10.3389/fgene.2019.01168
- 857 Crossa, J., Fritsche-Neto, R., Montesinos-lopez, O. A., Costa-Neto, G., Dreisigacker, S., Montesinos-lopez,  
858 A., et al. (2021). The Modern Plant Breeding Triangle : Optimizing the Use of Genomics , Phenomics ,  
859 and Enviromics Data. *Front. Plant Sci.* 12, 1–6. doi:10.3389/fpls.2021.651480.
- 860 Cuevas, J., Montesinos-López, O., Juliana, P., Guzmán, C., Pérez-Rodríguez, P., González-Bucio, J., et al.  
861 (2019). Deep Kernel for genomic and near infrared predictions in multi-environment breeding trials. *G3*  
862 *Genes, Genomes, Genet.* 9, 2913–2924. doi:10.1534/g3.119.400493.
- 863 de los Campos, G., Pérez-Rodríguez, P., Bogard, M., Gouache, D., and Crossa, J. (2020). A data-driven  
864 simulation platform to predict cultivars' performances under uncertain weather conditions. *Nat.*  
865 *Commun.* 11. doi:10.1038/s41467-020-18480-y.
- 866 de Oliveira, A. A., Resende, M. F. R., Ferrão, L. F. V., Amadeu, R. R., Guimarães, L. J. M., Guimarães, C. T.,  
867 et al. (2020). Genomic prediction applied to multiple traits and environments in second season maize  
868 hybrids. *Heredity (Edinb)*. 125, 60–72. doi:10.1038/s41437-020-0321-0.
- 869 Dias, K. O. D. G., Gezan, S. A., Guimarães, C. T., Nazarian, A., Da Costa E Silva, L., Parentoni, S. N., et al.  
870 (2018). Improving accuracies of genomic predictions for drought tolerance in maize by joint modeling of  
871 additive and dominance effects in multi-environment trials. *Heredity (Edinb)*. 121, 24–37.  
872 doi:10.1038/s41437-018-0053-6.
- 873 Epinat-Le Signor, C., Dousse, S., Lorgeou, J., Denis, J.-B., Bonhomme, R., Carolo, P., et al. (2001).  
874 Interpretation of genotype x environment interactions for early maize hybrids over 12 years. *Crop Sci.*  
875 41, 663–669. doi:10.2135/cropsci2001.413663x.
- 876 Finlay, K. W., and Wilkinson, G. N. (1963). The analysis of adaptation in a plant breeding programme. *J.*  
877 *Agric. Res.* 14, 742–754.
- 878 Gage, J. L., Jarquin, D., Romay, C., Lorenz, A., Buckler, E. S., Kaeppler, S., et al. (2017). The effect of  
879 artificial selection on phenotypic plasticity in maize. *Nat. Commun.* 8. doi:10.1038/s41467-017-01450-2.
- 880 Galli, G., Sabadin, F., Costa-Neto, G. M. F., and Fritsche-Neto, R. (2021). A novel way to validate UAS-based  
881 high-throughput phenotyping protocols using in silico experiments for plant breeding purposes. *Theor.*  
882 *Appl. Genet.* 134, 715–730. doi:10.1007/s00122-020-03726-6.

- 883 Gillberg, J., Marttinen, P., Mamitsuka, H., and Kaski, S. (2019). Modelling G×E with historical weather  
884 information improves genomic prediction in new environments. *Bioinformatics* 35, 4045–4052.  
885 doi:10.1093/bioinformatics/btz197.
- 886 Granato, I., Cuevas, J., Luna-Vázquez, F., Crossa, J., Montesinos-López, O., Burgueño, J., et al. (2018).  
887 BGGE: A new package for genomic-enabled prediction incorporating genotype × environment  
888 interaction models. *G3 Genes, Genomes, Genet.* 8, 3039–3047. doi:10.1534/g3.118.200435.
- 889 Guo, T., Mu, Q., Wang, J., Vanous, A. E., Onogi, A., Iwata, H., et al. (2020). Dynamic effects of interacting  
890 genes underlying rice flowering-time phenotypic plasticity and global adaptation. *Genome Res.* 30, 673–  
891 683. doi:10.1101/gr.255703.119.
- 892 Hammer, G., Messina, C., Wu, A., and Cooper, M. (2019). Biological reality and parsimony in crop models —  
893 why we need both in crop improvement ! 1–21. doi:10.1093/insilicoplants/diz010.
- 894 Heinemann, A. B., Ramirez-Villegas, J., Rebolledo, M. C., Costa Neto, G. M. F., and Castro, A. P. (2019).  
895 Upland rice breeding led to increased drought sensitivity in Brazil. *F. Crop. Res.* 231, 57–67.  
896 doi:10.1016/j.fcr.2018.11.009.
- 897 Heslot, N., Akdemir, D., Sorrells, M. E., and Jannink, J.-L. (2014). Integrating environmental covariates and  
898 crop modeling into the genomic selection framework to predict genotype by environment interactions.  
899 *Theor. Appl. Genet.* 127, 463–480.
- 900 Jarquín, D., Crossa, J., Lacaze, X., Du Cheyron, P., Daucourt, J., Lorgeou, J., et al. (2014). A reaction norm  
901 model for genomic selection using high-dimensional genomic and environmental data. *Theor. Appl.*  
902 *Genet.* 127, 595–607. doi:10.1007/s00122-013-2243-1.
- 903 Jarquin, D., Kajiya-Kanegae, H., Taishen, C., Yabe, S., Persa, R., Yu, J., et al. (2020). Coupling day length  
904 data and genomic prediction tools for predicting time-related traits under complex scenarios. *Sci. Rep.*  
905 10, 1–12. doi:10.1038/s41598-020-70267-9.
- 906 Jończyk, M., Sobkowiak, A., Trzcinska-Danielewicz, J., Skoneczny, M., Solecka, D., Fronk, J., et al. (2017).  
907 Global analysis of gene expression in maize leaves treated with low temperature. II. Combined effect of  
908 severe cold (8 °C) and circadian rhythm. *Plant Mol. Biol.* 95, 279–302. doi:10.1007/s11103-017-0651-3.
- 909 Lorenzana, R. E., and Bernardo, R. (2009). Accuracy of genotypic value predictions for marker-based  
910 selection in biparental plant populations. *Theor. Appl. Genet.* 120, 151–161. doi:10.1007/s00122-009-  
911 1166-3.
- 912 Li, X., Guo, T., Mu, Q., Li, X., and Yu, J. (2018). Genomic and environmental determinants and their  
913 interplay underlying phenotypic plasticity. *Proc. Natl. Acad. Sci. U. S. A.* 115, 6679–6684.  
914 doi:10.1073/pnas.1718326115.
- 915 Liu, S., Li, C., Wang, H., Wang, S., Yang, S., Liu, X., et al. (2020). Mapping regulatory variants controlling  
916 gene expression in drought response and tolerance in maize. *Genome Biol.* 21, 1–22.  
917 doi:10.1186/s13059-020-02069-1.
- 918 Ly, D., Huet, S., Gauffreteau, A., Rincint, R., Touzy, G., Mini, A., et al. (2018). Whole-genome prediction of  
919 reaction norms to environmental stress in bread wheat (*Triticum aestivum* L.) by genomic random  
920 regression. *F. Crop. Res.* 216, 32–41. doi:10.1016/j.fcr.2017.08.020.

- 921 Martini, J. W. R., Crossa, J., Toledo, F. H., and Cuevas, J. (2020). On Hadamard and Kronecker products in  
922 covariance structures for genotype  $\times$  environment interaction. *Plant Genome* 13, 1–12.  
923 doi:10.1002/tpg2.20033.
- 924 Messina, C. D., Technow, F., Tang, T., Totir, R., Gho, C., and Cooper, M. (2018). Leveraging biological  
925 insight and environmental variation to improve phenotypic prediction: Integrating crop growth models  
926 (CGM) with whole genome prediction (WGP). *Eur. J. Agron.* 100, 151–162.
- 927 Meuwissen, T. H. E., Hayes, B. J., and Goddard, M. E. (2001). Prediction of total genetic value using genome-  
928 wide dense marker maps. *Genetics* 157, 1819–1829.
- 929 Montesinos-López, A., Montesinos-López, O. A., Gianola, D., Crossa, J., and Hernández-Suárez, C. M.  
930 (2018). Multi-environment genomic prediction of plant traits using deep learners with dense architecture.  
931 *G3 Genes, Genomes, Genet.* 8, 3813–3828. doi:10.1534/g3.118.200740.
- 932 Millet, E. J., Kruijer, W., Coupel-Ledru, A., Alvarez Prado, S., Cabrera-Bosquet, L., Lacube, S., et al. (2019).  
933 Genomic prediction of maize yield across European environmental conditions. *Nat. Genet.* 51,  
934 pages952–956. doi:10.1038/s41588-019-0414-y.
- 935 Misztal, I. (2016). Inexpensive computation of the inverse of the genomic relationship matrix in populations  
936 with small effective population size. *Genetics* 202, 401–409. doi:10.1534/genetics.115.182089.
- 937 Morais Júnior, O. P., Duarte, J. B., Breseghello, F., Coelho, A. S. G., and Magalhães Júnior, A. M. (2018).  
938 Single-step reaction norm models for genomic prediction in multi-environment recurrent selection trials.  
939 *Crop Sci.* 58, 592–607. doi:10.2135/cropsci2017.06.0366.
- 940 Porker, K., Coventry, S., Fettell, N. A., Cozzolino, D., and Eglinton, J. (2020). Using a novel PLS approach  
941 for envirotyping of barley phenology and adaptation. *F. Crop. Res.* 246, 1–11.  
942 doi:10.1016/j.fcr.2019.107697.
- 943 Ramirez-Villegas, J., Heinemann, A. B., Castro, A. P., Breseghello, F., Navarro-Racines, C., Li, T., et al.  
944 (2018). Breeding implications of drought stress under future climate for upland rice in Brazil. *Glob.*  
945 *Chang. Biol.* 1, 1–16. doi:10.1111/ijlh.12426.
- 946 Ramirez-Villegas, J., Molero Milan, A., Alexandrov, N., Asseng, S., Challinor, A. J., Crossa, J., et al. (2020).  
947 CGIAR modeling approaches for resource-constrained scenarios: I. Accelerating crop breeding for a  
948 changing climate. *Crop Sci.* 60, 547–567. doi:10.1002/csc2.20048.
- 949 Resende, R. T., Piepho, H. P., Rosa, G. J. M., Silva-Junior, O. B., e Silva, F. F., de Resende, M. D. V., et al.  
950 (2020). Enviromics in breeding: applications and perspectives on envirotypic-assisted selection. *Theor.*  
951 *Appl. Genet.* doi:10.1007/s00122-020-03684-z.
- 952 Robert, P., Le Gouis, J., and Rincent, R. (2020). Combining Crop Growth Modeling With Trait-Assisted  
953 Prediction Improved the Prediction of Genotype by Environment Interactions. *Front. Plant Sci.* 11, 1–11.  
954 doi:10.3389/fpls.2020.00827.
- 955 Rogers, A. R., Dunne, J. C., Romay, C., Bohn, M., Buckler, E. S., Ciampitti, I. A., et al. (2021). The  
956 importance of dominance and genotype-by-environment interactions on grain yield variation in a large-  
957 scale public cooperative maize experiment. *G3 Genes/Genomes/Genetics* 11.  
958 doi:10.1093/g3journal/jkaa050.

- 959 Romay, M. C., Malvar, R. A., Campo, L., Alvarez, A., Moreno-González, J., Ordás, A., et al. (2010). Climatic  
960 and genotypic effects for grain yield in maize under stress conditions. *Crop Sci.* 50, 51–58.
- 961 Shelford, V. . E. . (1931). Some Concepts of Bioecology. *Ecology* 12, 455–467.
- 962 Sparks, A. (2018). nasapower: A NASA POWER Global Meteorology, Surface Solar Energy and Climatology  
963 Data Client for R. *J. Open Source Softw.* 3, 1035. doi:10.21105/joss.01035.
- 964 Tigchelaar, M., Battisti, D. S., Naylor, R. L., and Ray, D. K. (2018). Future warming increases probability of  
965 globally synchronized maize production shocks. *Proc. Natl. Acad. Sci. U. S. A.* 115, 6644–6649.  
966 doi:10.1073/pnas.1718031115.
- 967 Toda, Y., Wakatsuki, H., Aoike, T., Kajiya-Kanegae, H., Yamasaki, M., Yoshioka, T., et al. (2020). Predicting  
968 biomass of rice with intermediate traits: Modeling method combining crop growth models and genomic  
969 prediction models. *PLoS One* 15, 1–21. doi:10.1371/journal.pone.0233951.
- 970 Unterseer, S., Bauer, E., Haberer, G., Seidel, M., Knaak, C., Ouzunova, M., et al. (2014). A powerful tool for  
971 genome analysis in maize: Development and evaluation of the high density 600 k SNP genotyping array.  
972 *BMC Genomics* 15, 1–15. doi:10.1186/1471-2164-15-823.
- 973 Vargas, M., Van Eeuwijk, F. A., Crossa, J., and Ribaut, J. M. (2006). Mapping QTLs and QTL x environment  
974 interaction for CIMMYT maize drought stress program using factorial regression and partial least  
975 squares methods. *Theor. Appl. Genet.* 112, 1009–1023. doi:10.1007/s00122-005-0204-z.
- 976 Voss-Fels, K. P., Cooper, M., and Hayes, B. J. (2019). Accelerating crop genetic gains with genomic selection.  
977 *Theor. Appl. Genet.* 132, 669–686. doi:10.1007/s00122-018-3270-8.
- 978 Vendramin, S., Huang, J., Crisp, P. A., Madzima, T. F., and McGinnis, K. M. (2020). Epigenetic regulation of  
979 ABA-induced transcriptional responses in maize. *G3 Genes, Genomes, Genet.* 10, 1727–1743.  
980 doi:10.1534/g3.119.400993.
- 981 Vidotti, M. S., Matias, F. I., Alves, F. C., Rodríguez, P. P., Beltran, G. A., Burguenõ, J., et al. (2019). Maize  
982 responsiveness to *Azospirillum brasilense*: Insights into genetic control, heterosis and genomic  
983 prediction. *PLoS One* 14, 1–22. doi:10.1371/journal.pone.0217571.
- 984 Westhues, M., Schrag, T. A., Heuer, C., Thaller, G., Utz, H. F., Schipprack, W., et al. (2017). Omics-based  
985 hybrid prediction in maize. *Theor. Appl. Genet.* doi:10.1007/s00122-017-2934-0.
- 986 Windhausen, V. S., Atlin, G. N., Hickey, J. M., Crossa, J., Jannink, J.-L., Sorrells, M. E., et al. (2012).  
987 Effectiveness of Genomic Prediction of Maize Hybrid Performance in Different Breeding Populations  
988 and Environments. *G3: Genes/Genomes/Genetics* 2, 1427–1436. doi:10.1534/g3.112.003699.
- 989 Xu, Y. (2016). Envirotyping for deciphering environmental impacts on crop plants. *Theor. Appl. Genet.* 129,  
990 653–673. doi:10.1007/s00122-016-2691-5.
- 991 Zhao, Y., Gowda, M., Liu, W., Würschum, T., Maurer, H. P., Longin, F. H., et al. (2012). Accuracy of  
992 genomic selection in European maize elite breeding populations. *Theor. Appl. Genet.* 124, 769–776.  
993 doi:10.1007/s00122-011-1745-y.
- 994 Zhang, X., Pérez-Rodríguez, P., Semagn, K., Beyene, Y., Babu, R., López-Cruz, M. A., et al. (2015). Genomic  
995 prediction in biparental tropical maize populations in water-stressed and well-watered environments  
996 using low-density and GBS SNPs. *Heredity (Edinb.)* 114, 291–299. doi:10.1038/hdy.2014.99.

997 **6 TABLES**

998 **Table 1.** Predictive ability ( $\pm$  standard error) of the genome-based prediction models (GP) for the N-level set of  
 999 tropical maize hybrids (570 hybrids  $\times$  2 locations  $\times$  two years  $\times$  two nitrogen managements). Bold values denote  
 1000 higher predictive ability values for each scenario: G,E (known genotypes at known growing conditions), G,nE  
 1001 (known genotypes at new growing conditions), nG, E (new genotypes at known growing conditions), and nG,  
 1002 nE (new genotypes at new growing conditions).

| Training Setup      | Model     | Prediction Scenario      |                          |                          |                          |
|---------------------|-----------|--------------------------|--------------------------|--------------------------|--------------------------|
|                     |           | G, E                     | G, nE                    | nG, E                    | nG, nE                   |
| 7/8<br>Environments | GBLUP     | 0.771 $\pm$ 0.064        | 0.397 $\pm$ 0.046        | 0.310 $\pm$ 0.054        | 0.297 $\pm$ 0.029        |
|                     | E-GP (BD) | <b>0.903</b> $\pm$ 0.115 | <b>0.493</b> $\pm$ 0.169 | <b>0.615</b> $\pm$ 0.022 | <b>0.416</b> $\pm$ 0.153 |
|                     | E-GP (RN) | 0.833 $\pm$ 0.118        | <b>0.477</b> $\pm$ 0.199 | <b>0.613</b> $\pm$ 0.040 | 0.394 $\pm$ 0.193        |
|                     | W-GP (BD) | <b>0.915</b> $\pm$ 0.115 | 0.333 $\pm$ 0.208        | <b>0.614</b> $\pm$ 0.025 | 0.242 $\pm$ 0.189        |
|                     | W-GP (RN) | 0.885 $\pm$ 0.117        | 0.327 $\pm$ 0.210        | 0.613 $\pm$ 0.031        | 0.23 $\pm$ 0.196         |
| 5/8<br>Environments | GBLUP     | 0.747 $\pm$ 0.049        | 0.432 $\pm$ 0.046        | 0.294 $\pm$ 0.026        | 0.323 $\pm$ 0.04         |
|                     | E-GP (BD) | 0.905 $\pm$ 0.056        | <b>0.554</b> $\pm$ 0.144 | <b>0.659</b> $\pm$ 0.015 | <b>0.464</b> $\pm$ 0.113 |
|                     | E-GP (RN) | 0.833 $\pm$ 0.056        | <b>0.570</b> $\pm$ 0.132 | <b>0.660</b> $\pm$ 0.025 | <b>0.475</b> $\pm$ 0.104 |
|                     | W-GP (BD) | <b>0.931</b> $\pm$ 0.057 | 0.449 $\pm$ 0.286        | 0.659 $\pm$ 0.019        | 0.347 $\pm$ 0.253        |
|                     | W-GP (RN) | 0.897 $\pm$ 0.056        | 0.501 $\pm$ 0.229        | <b>0.660</b> $\pm$ 0.026 | 0.395 $\pm$ 0.198        |
| 3/8<br>Environments | GBLUP     | 0.739 $\pm$ 0.040        | 0.527 $\pm$ 0.080        | 0.295 $\pm$ 0.015        | 0.394 $\pm$ 0.044        |
|                     | E-GP (BD) | 0.899 $\pm$ 0.026        | 0.534 $\pm$ 0.081        | 0.660 $\pm$ 0.012        | 0.388 $\pm$ 0.038        |
|                     | E-GP (RN) | 0.823 $\pm$ 0.026        | <b>0.566</b> $\pm$ 0.086 | <b>0.663</b> $\pm$ 0.015 | <b>0.420</b> $\pm$ 0.041 |
|                     | W-GP (BD) | <b>0.924</b> $\pm$ 0.026 | 0.532 $\pm$ 0.08         | 0.660 $\pm$ 0.015        | 0.384 $\pm$ 0.038        |
|                     | W-GP (RN) | 0.886 $\pm$ 0.025        | <b>0.579</b> $\pm$ 0.088 | <b>0.663</b> $\pm$ 0.020 | <b>0.424</b> $\pm$ 0.041 |

1003

1004

1005 **Table 2.** Predictive ability ( $\pm$  standard error) of the genome-based prediction models (GP) for the Multi-Local  
 1006 set of tropical maize hybrids (247 hybrids  $\times$  5 locations in different regions of Brazil). Bold values denote the  
 1007 higher predictive ability values for each scenario: G,E (known genotypes at known growing conditions), G,nE  
 1008 (known genotypes at new growing conditions), nG, E (new genotypes at known growing conditions), and nG,  
 1009 nE (new genotypes at new growing conditions).  
 1010

| Training Setup      | Model     | Prediction Scenario      |                          |                          |                          |
|---------------------|-----------|--------------------------|--------------------------|--------------------------|--------------------------|
|                     |           | G, E                     | G, nE                    | nG, E                    | nG, nE                   |
| 4/5<br>Environments | GBLUP     | 0.953 $\pm$ 0.040        | 0.497 $\pm$ 0.072        | 0.552 $\pm$ 0.171        | 0.340 $\pm$ 0.138        |
|                     | E-GP (BD) | <b>0.987</b> $\pm$ 0.006 | <b>0.526</b> $\pm$ 0.054 | <b>0.599</b> $\pm$ 0.097 | <b>0.363</b> $\pm$ 0.131 |
|                     | E-GP (RN) | 0.873 $\pm$ 0.084        | 0.520 $\pm$ 0.064        | 0.496 $\pm$ 0.126        | <b>0.358</b> $\pm$ 0.143 |
|                     | W-GP (BD) | <b>0.989</b> $\pm$ 0.005 | <b>0.527</b> $\pm$ 0.056 | <b>0.599</b> $\pm$ 0.098 | 0.361 $\pm$ 0.131        |
|                     | W-GP (RN) | 0.931 $\pm$ 0.057        | 0.492 $\pm$ 0.078        | 0.501 $\pm$ 0.130        | <b>0.366</b> $\pm$ 0.125 |
| 3/5<br>Environments | GBLUP     | 0.927 $\pm$ 0.045        | 0.528 $\pm$ 0.066        | 0.543 $\pm$ 0.208        | 0.381 $\pm$ 0.142        |
|                     | E-GP (BD) | <b>0.984</b> $\pm$ 0.006 | <b>0.556</b> $\pm$ 0.052 | <b>0.597</b> $\pm$ 0.097 | <b>0.400</b> $\pm$ 0.131 |
|                     | E-GP (RN) | 0.845 $\pm$ 0.073        | 0.550 $\pm$ 0.059        | 0.477 $\pm$ 0.120        | 0.385 $\pm$ 0.135        |
|                     | W-GP (BD) | <b>0.987</b> $\pm$ 0.005 | <b>0.555</b> $\pm$ 0.053 | <b>0.598</b> $\pm$ 0.095 | <b>0.394</b> $\pm$ 0.132 |
|                     | W-GP (RN) | 0.915 $\pm$ 0.049        | 0.514 $\pm$ 0.072        | 0.483 $\pm$ 0.124        | 0.392 $\pm$ 0.119        |
| 2/5<br>Environments | GBLUP     | 0.913 $\pm$ 0.050        | 0.552 $\pm$ 0.063        | 0.538 $\pm$ 0.223        | 0.409 $\pm$ 0.149        |
|                     | E-GP (BD) | <b>0.982</b> $\pm$ 0.006 | <b>0.574</b> $\pm$ 0.051 | <b>0.593</b> $\pm$ 0.095 | <b>0.410</b> $\pm$ 0.135 |
|                     | E-GP (RN) | 0.831 $\pm$ 0.069        | 0.572 $\pm$ 0.060        | 0.468 $\pm$ 0.117        | 0.394 $\pm$ 0.134        |
|                     | W-GP (BD) | <b>0.986</b> $\pm$ 0.004 | <b>0.575</b> $\pm$ 0.051 | <b>0.592</b> $\pm$ 0.096 | <b>0.411</b> $\pm$ 0.139 |
|                     | W-GP (RN) | 0.906 $\pm$ 0.046        | 0.539 $\pm$ 0.067        | 0.476 $\pm$ 0.119        | 0.404 $\pm$ 0.116        |

1011

1012

1013 **Table 3.** Predictive ability of the genomic prediction models (GP) for two tropical maize data sets (Multi-  
 1014 Regional and N-level) produced using the effective number of phenotypic records ( $N_{GE}$ , genotypes-  
 1015 environments observations) and for the scenarios Field Trials (predicting  $N_{GE}$ ) and Virtual Network (predicting  
 1016  $n - N_{GE}$ , where  $n$  is the number of genotypes by environments available in the full data set). The reference "full"  
 1017 and "5%" in parentheses represents the predictive ability produced with all genotypes and using only the top  
 1018 5%, respectively

| Scenario                  | Models |           |           |           |           |
|---------------------------|--------|-----------|-----------|-----------|-----------|
|                           | GBLUP  | W-GP (BD) | W-GP (RN) | E-GP (BD) | E-GP (RN) |
| <b>Multi-Regional set</b> |        |           |           |           |           |
| <b>Field Trials</b>       |        |           |           |           |           |
| $N_{GE} = 210$ (full)     | 0.698  | 0.962     | 0.892     | 0.964     | 0.893     |
| $N_{GE} = 210$ (5%)       | 0.991  | 0.995     | 0.992     | 0.997     | 0.998     |
| $N_{GE} = 49$ (full)      | 0.738  | 0.941     | 0.840     | 0.942     | 0.840     |
| $N_{GE} = 49$ (5%)        | 0.991  | 0.991     | 0.991     | 1.000     | 1.000     |
| <b>Virtual Network</b>    |        |           |           |           |           |
| $N_{GE} = 210$ (full)     | 0.175  | 0.794     | 0.787     | 0.793     | 0.787     |
| $N_{GE} = 210$ (5%)       | 0.098  | 0.736     | 0.750     | 0.713     | 0.715     |
| $N_{GE} = 49$ (full)      | 0.190  | 0.810     | 0.788     | 0.810     | 0.789     |
| $N_{GE} = 49$ (5%)        | 0.241  | 0.759     | 0.755     | 0.758     | 0.706     |
| <b>N-level set</b>        |        |           |           |           |           |
| <b>Field Trials</b>       |        |           |           |           |           |
| $N_{GE} = 536$ (full)     | 0.982  | 0.984     | 0.775     | 0.991     | 0.775     |
| $N_{GE} = 536$ (5%)       | 0.964  | 0.861     | 0.861     | 0.998     | 0.999     |
| $N_{GE} = 67$ (full)      | 0.983  | 0.981     | 0.718     | 0.989     | 0.719     |
| $N_{GE} = 67$ (5%)        | 0.967  | 0.833     | 0.802     | 0.998     | 1.000     |
| <b>Virtual Network</b>    |        |           |           |           |           |
| $N_{GE} = 536$ (full)     | 0.196  | 0.608     | 0.612     | 0.601     | 0.612     |
| $N_{GE} = 536$ (5%)       | 0.152  | 0.554     | 0.545     | 0.406     | 0.484     |
| $N_{GE} = 67$ (full)      | 0.102  | 0.574     | 0.572     | 0.578     | 0.573     |
| $N_{GE} = 67$ (5%)        | 0.070  | 0.545     | 0.539     | 0.379     | 0.510     |



1020

1021 **7 Figure Captions**

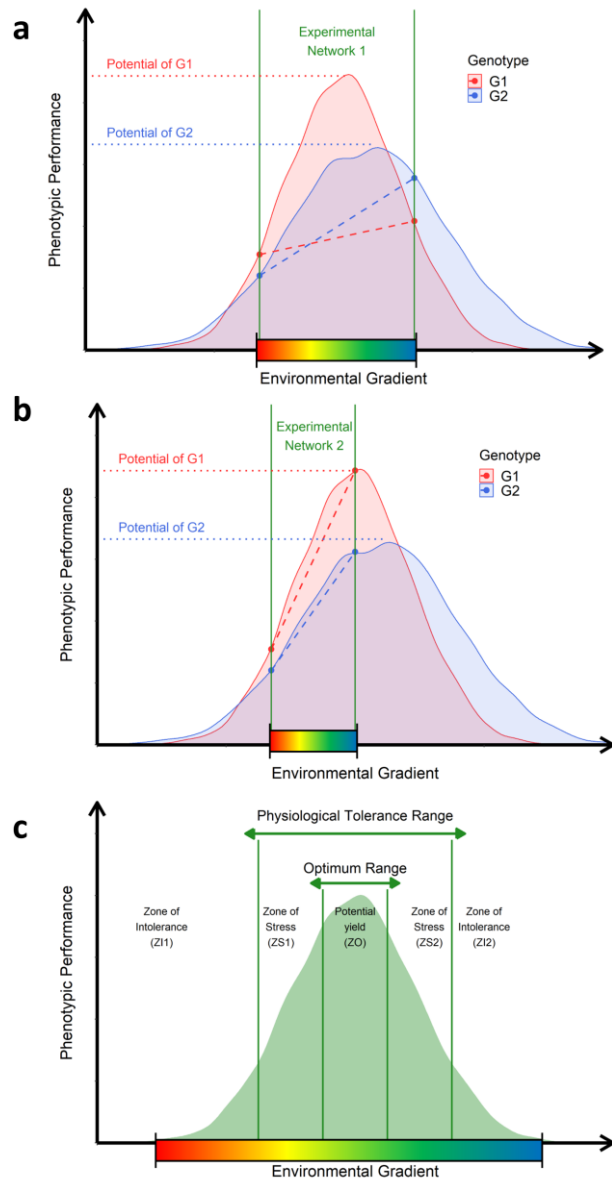

1022

1023 **Fig. 1. Ecophysiological insights to translate raw-environmental data into enviromic sources.** a. Representation of  
1024 an experimental network involving an unknown number of environments from a theoretical TPE and two genotypes (G1  
1025 and G2). The range of the environmental gradient is delimited by the space between the two vertical green lines. Each  
1026 genotype has a nonlinear function describing the genetic limits of their phenotypic plasticity (curves) and genetic  
1027 potential (horizontal dotted lines) of a given trait. Diagonal dotted lines denote the observed reaction-norm experienced  
1028 by those genotypes; b. representation of a second experimental network involving the same genotypes, but different  
1029 environments were sampled from the theoretical TPE. c. adaptation of Shelford's Law of Tolerance, describing the  
1030 cardinal (or biological) genetic limits (vertical green lines) to determine the amount of the factor that results in different  
1031 adaptation zones. Across these zones, crop performance is described by zones of stress caused by deficit or excess  
1032 (physiological tolerance range) and zones of optimal growing conditions that allow the plants to express the genetic  
1033 potential for a given trait (optimum range). The core of possible environmental variations contemplated as putative  
1034 phenotypic plasticity for a given genotype, germplasm, or crop species.

1035

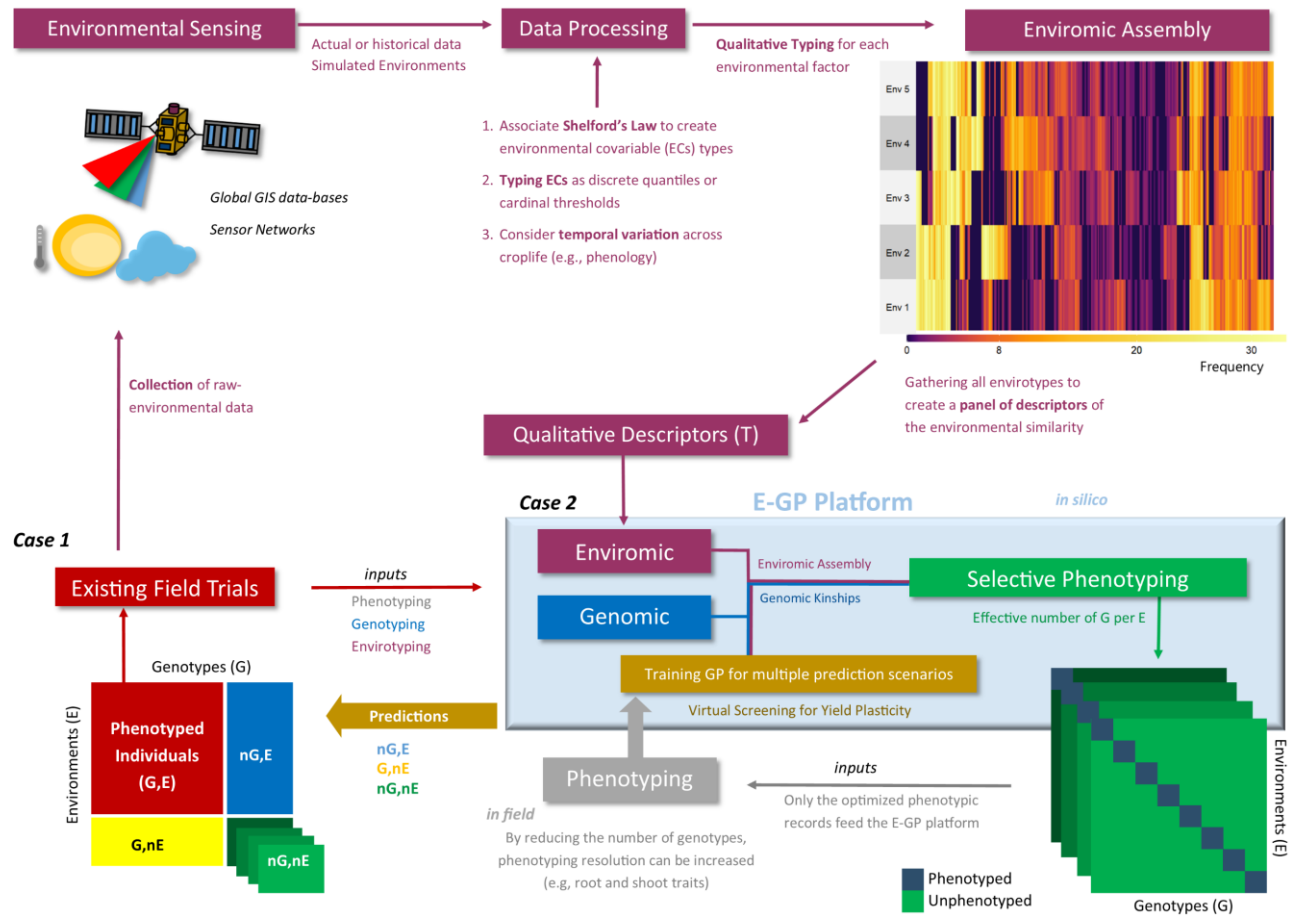

1036

1037 **Fig. 2. Workflow of the E-GP considering the two study cases (Case 1 and Case 2) of this study**

1038

1039

1040

1041

1042

1043

1044



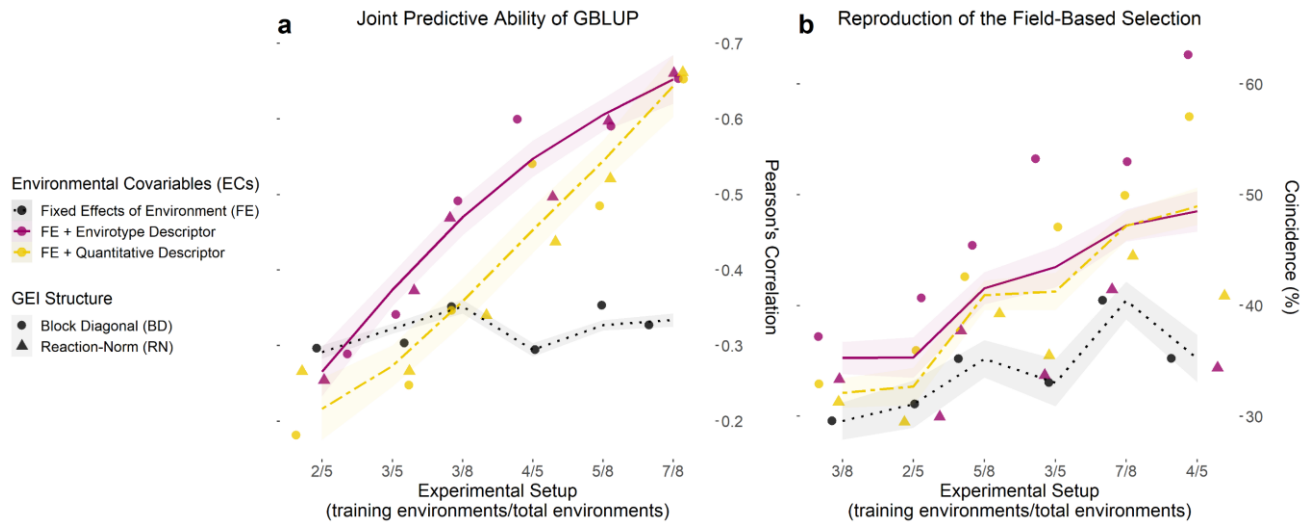

1045

1046 **Fig. 3. Joint accuracy trends of GP models for each training setup of existing experimental networks.** **a.** Predictive  
 1047 ability computed with the correlation ( $r$ ) between observed ( $y$ ) and predicted ( $\hat{y}$ ) values for the grain yield of each  
 1048 genotype in each environment, over three experimental setups (number of environments used/total of environments) for  
 1049 both maize sets (N-level and Multi-local), using 70% of the genotypes as a training set and the remaining 30% as a testing  
 1050 set. **b.** Coincidence index (CS) between the field-based and prediction-based selection of the best 5% genotypes in each  
 1051 environment for the same experimental setups and data sets. Dots and triangles represent the point estimates of predictive  
 1052 ability and CS for models involving a block diagonal genomic matrix for  $G \times E$  effects (dotted) and an enviromic  $\times$   
 1053 genomic reaction-norm  $G \times E$  effect (triangle). Trend lines were plotted from the partial values of each sample (from 1 to  
 1054 50) and three prediction scenarios ( $nG$ ,  $E$ ;  $G$ ,  $nE$  and  $nG$ ,  $nE$ ) by using the `gam()` integrated with smoothness estimation in  
 1055 R. Black dotted lines represent the benchmark GBLUP method, considering the effect of the environment as a fixed  
 1056 intercept. Yellow two-dash lines represent the GBLUP involving the main effect from quantitative descriptors (**W**  
 1057 matrix). Finally, solid dark pink lines represent the GBLUP involving the main effect of envirotypes descriptors (**T**  
 1058 matrix). Thus, the latter represents the E-GP based approach for *Case 1* (predictions under existing experimental  
 1059 networks).

1060

1061

1062

1063

1064

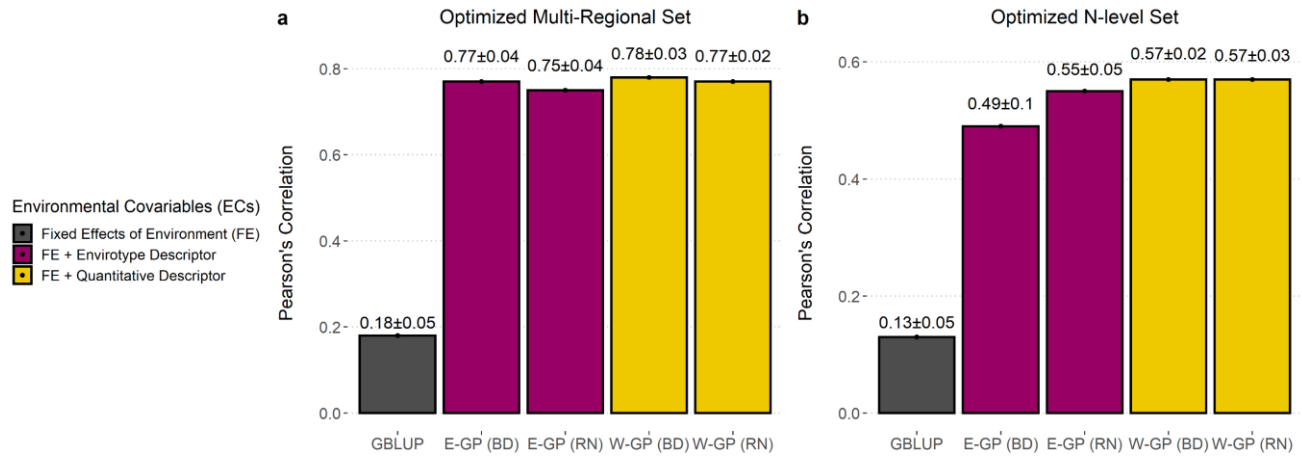

1065

1066 **Fig. 4. Accuracy of GP models trained with super-optimized experimental networks.** Predictive ability ( $r$ ) plus  
1067 standard deviation measured by the correlation between observed and predicted values for each model in the optimized  
1068 Multi-Regional Set (**a**); and for the N level Set (**b**). Barplots were colored according to the type of environmental  
1069 covariable (ECs) used: none (black), envirotype descriptor (**T** matrix, wine), and quantitative descriptor (**W** matrix,  
1070 yellow).

1071

1072

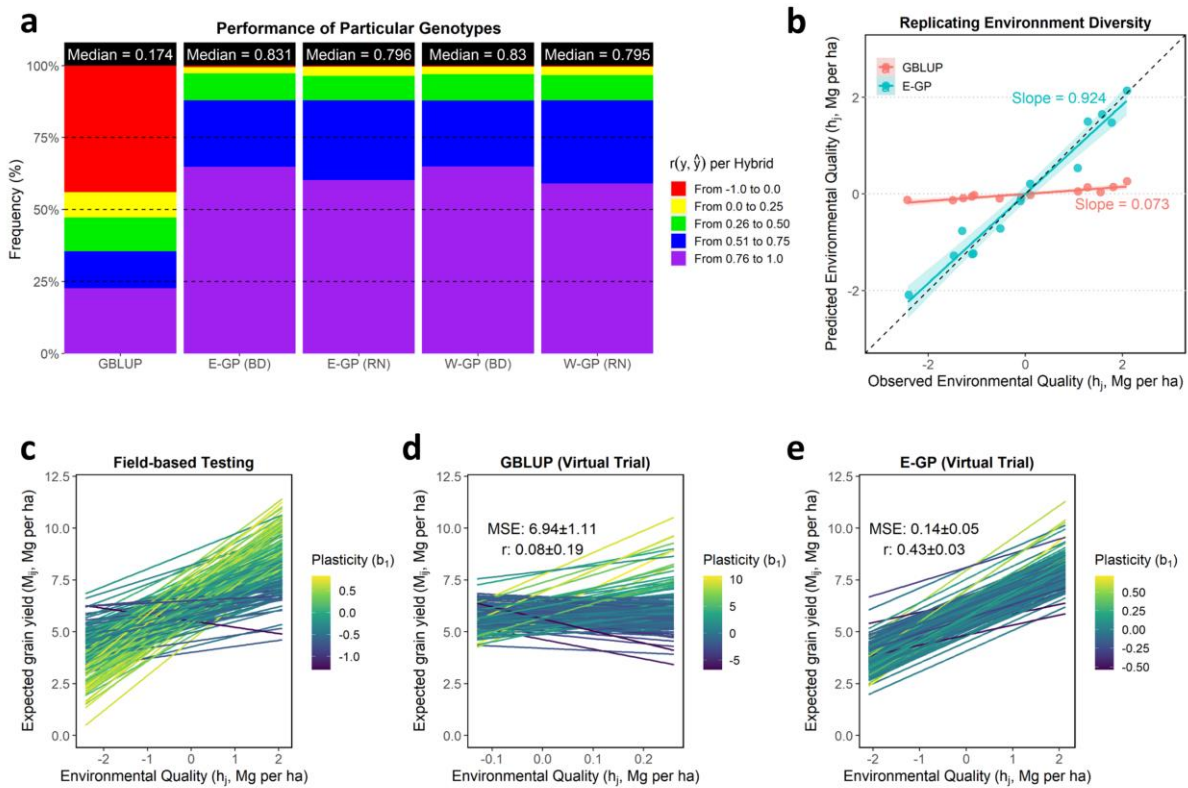

1073

1074 **Fig. 5. Accuracy of GP models in reproducing the genotype-specific plasticity.** **a.** The panel of predictive ability ( $r$ )  
 1075 explaining the plasticity of genotypes across environments. This statistic was estimated for each individual (hybrid) by  
 1076 correlating observed and predicted values across environments. Individuals with values below 0 were considered  
 1077 unpredictable and marked in red. **b.** ability of the prediction-based tools to reproduce an existing experimental network's  
 1078 environmental quality ( $h_j$ ). In the X-axis, we find the  $h_j$  computed using the phenotypic records of a current experimental  
 1079 network. In the Y-axis, the  $h_j$  values are presented considering a virtual experimental network built up using GBLUP and  
 1080 E-GP (with BD) predictions. **c-e.** Yield plasticity panels denoting each genotype's G×E effects across the  $h_j$  values for  
 1081 observed field-testing screening (**c**) concerning prediction-based (**d-e**). Only the 5% best genotypes in each environment  
 1082 were used to create this plot. Each line was colored with the genotype-specific plasticity coefficient ( $b_1$ ). For the N-level  
 1083 set, the full-optimized set (536 hybrids over eight environments) was used.
